# Supplementary material
Source: publisher figshare collection journal article supplement (https://rs.figshare.com/ndownloader/files/18502097)
Supplement: Supplementary file 1 [file 18502097]

## Sheet: Metadata
The use of this dataset is conditional on the citation of this article:
McCarthy JK, Dwyer JM, Mokany K. A regional-scale assessment of using metabolic scaling theory to predict ecosystem properties. Proceedings of the Royal Society B: Biological Sciences. (doi: 10.1098/rspb.2019-2221)
These data took a long time to collect. If you are planning on using all, or most of it in a single analysis or paper, please consider offering co-authorship.
This dataset includes:
Site level environmental variables, trait CWMs, plot coordinates, and MST-derived properties -- "Site data" tab
Stem measurements, note that some measurements were scaled up from sub-plots to the full plot in our analysis (full plot = 20 x 50 m; see measuredArea column). Note that scaled up data are not provided here -- "Stem data" tab

## Sheet: Site data
site	latitude	longitude	actual_exp	gof	actual_exp_Btot	neg2_Btot	actual_Btot	GPP_tree	veg.type	AridityIndex	fire.binary	SEQ_SolSand	sqrt.height.cwm	log.SLA.cwm	sqrt.WD.cwm
1	-26.0739	151.75	-1.51521	0.386139	650.991	515.546	6682.5	4.37882	sclerophyll	4548	0	58.1317	5.49532	0.718221	0.874367
2	-25.1431	152.592	-1.90826	0.19296	13709.7	10926.2	6268.5	6.91339	heath	8014	0	77.0215	2.38686	0.749715	0.752737
3	-26.0497	153.04	-2.83475	0.656094	500	500	2000	6.0213	heath	11132	1	78.4519	1.67032	0.704035	0.792989
4	-25.0494	152.487	-2.11838	0.137344	7413.57	6393.29	5949.75	5.91075	heath	7856	1	71.0524	2.66269	0.696013	0.819287
5	-25.0592	153.243	-2.99292	0.237473	952.274	712.912	9244	7.55629	sclerophyll	11058	1	77.2903	4.54922	0.673163	0.865447
6	-25.2939	153.167	-2.28181	0.584937	12805.5	9449.65	24059	8.51732	rainforest	11155	0	74.4226	5.65482	1.10949	0.786126
7	-26.0753	152.984	-1.89773	0.494764	2269.25	1767.36	6120.5	6.65469	sclerophyll	10765	0	72.6954	4.47098	0.644198	0.787439
8	-26.0578	151.754	-1.69663	0.505155	443.159	354.366	4837	4.71243	sclerophyll	4560	0	57.5042	5.80763	0.726499	0.924301
9	-26.9025	151.636	-1.82712	0.185988	13514.6	10292.4	13926.8	5.60732	rainforest	5897	0	38.8577	3.79351	1.24562	0.789546
10	-26.3897	151.909	-1.4746	0.278301	292.296	233.731	3767.5	5.19269	sclerophyll	5275	1	67.6817	5.88928	0.678858	0.945973
11	-25.0156	152.433	-2.3377	0.143805	15263.8	12811.2	6505.5	3.28845	heath	7746	1	68.7757	2.01944	0.776404	0.876412
12	-26.9919	151.904	-1.78979	0.25	2276.97	1863.41	5936	4.62906	sclerophyll	5243	0	59.7207	4.77893	0.70944	0.860673
13	-28.025	152.549	-2.32826	0.685061	1468.09	1206.88	5519	5.72439	sclerophyll	6038	0	64.272	4.64289	0.82854	0.758764
14	-25.6817	152.563	-1.68432	0.364198	794.843	645.036	4662.25	5.55938	sclerophyll	7298	1	59.3625	6.67863	0.699093	0.899141
15	-25.4781	152.436	-2.51585	0.128819	5348.41	4035.05	14470	5.41239	sclerophyll	7320	0	56.2456	5.33629	1.07464	0.809174
16	-26.3664	151.896	-1.57906	0.315825	369.224	293.314	5390	5.17677	sclerophyll	5219	1	57.7921	5.29238	0.675876	0.961838
17	-26.3633	151.895	-1.80665	0.102903	1848.07	1477.78	5307.75	5.26561	sclerophyll	5219	0	60.0889	5.5843	0.760838	0.936202
18	-25.0236	151.469	-1.89522	0.326446	2240.51	1738.46	7067	5.72082	sclerophyll	6137	1	52.6087	6.73592	0.700883	0.888456
19	-24.7053	151.995	-1.86297	0.303754	1664.44	1345.45	5548.25	6.57603	sclerophyll	7541	1	52.6189	5.6892	0.708541	0.92713
20	-26.9531	152.197	-1.86192	0.0738002	5647.91	4516.28	10307.2	7.63275	rainforest	5815	0	58.4998	4.52637	1.11536	0.774361
21	-26.4722	152.348	-1.66915	0.541096	1125.3	858.723	8740.25	6.87351	sclerophyll	8333	0	57.4726	7.06724	0.436394	0.861499
22	-24.5414	151.487	-1.95676	0.0536345	9379.43	7218.61	18203	7.54331	rainforest	7351	0	45.0724	4.9029	1.02841	0.875355
23	-26.0175	152.646	-1.55237	0.40625	930.583	711.592	7520.5	6.05676	sclerophyll	7784	0	56.7367	5.12578	0.712545	0.916916
24	-26.0544	153.011	-5.25086	0.98487	465.741	367.732	4680.5	6.39372	heath	10924	1	65.8916	2.42604	0.795384	0.849956
25	-27.4292	152.887	-1.79796	0.302188	3101.15	2537.9	6220.25	6.66924	sclerophyll	9106	1	47.1576	5.44857	0.77629	0.880345
26	-26.6067	152.693	-1.90024	0.102976	4358.01	3440.92	9185.25	6.93711	sclerophyll	9825	0	41.1165	5.55623	1.12136	0.82202
27	-26.6036	152.849	-1.67199	0.288981	5519.44	4229.44	14419.8	7.99857	sclerophyll	12666	0	44.2132	6.09207	0.761257	0.77249
28	-28.2072	153.188	-2.05926	0.156465	44402.2	32653.4	28911.5	7.25487	rainforest	14866	0	38.4281	5.23244	0.975235	0.827374
29	-28.0786	152.407	-1.64048	0.325	1072.81	825.658	7991.75	7.70302	sclerophyll	8216	0	42.2418	5.75085	0.904327	0.904609
30	-28.0808	152.413	-1.43347	0.352053	1003.39	762.657	9798.25	7.59284	sclerophyll	8718	1	42.3029	6.2463	0.870621	0.852448

## Sheet: Stem data
site	species	diameter_mm	measuredArea
1	Acacia.leiocalyx	51	20x50
1	Acacia.leiocalyx	54	20x50
1	Acacia.leiocalyx	54	20x50
1	Acacia.leiocalyx	54	20x50
1	Acacia.leiocalyx	54	20x50
1	Acacia.leiocalyx	55	20x50
1	Acacia.leiocalyx	57	20x50
1	Acacia.leiocalyx	61	20x50
1	Acacia.leiocalyx	61	20x50
1	Acacia.leiocalyx	63	20x50
1	Acacia.leiocalyx	63	20x50
1	Acacia.leiocalyx	63	20x50
1	Acacia.leiocalyx	64	20x50
1	Acacia.leiocalyx	65	20x50
1	Acacia.leiocalyx	65	20x50
1	Acacia.leiocalyx	68	20x50
1	Acacia.leiocalyx	69	20x50
1	Acacia.leiocalyx	74	20x50
1	Acacia.leiocalyx	75	20x50
1	Acacia.leiocalyx	82	20x50
1	Acacia.leiocalyx	86	20x50
1	Acacia.pustula	63	20x50
1	Acacia.pustula	69	20x50
1	Acacia.pustula	71	20x50
1	Acacia.pustula	76	20x50
1	Acacia.pustula	77	20x50
1	Acacia.pustula	80	20x50
1	Acacia.pustula	81	20x50
1	Alphitonia.excelsa	5.6	2x50
1	Alphitonia.excelsa	6.2	2x50
1	Alphitonia.excelsa	7.1	2x50
1	Alphitonia.excelsa	9.5	2x50
1	Corymbia.citriodora	127	20x50
1	Corymbia.citriodora	144	20x50
1	Corymbia.citriodora	172	20x50
1	Corymbia.citriodora	221	20x50
1	Corymbia.citriodora	224	20x50
1	Corymbia.citriodora	230	20x50
1	Corymbia.citriodora	269	20x50
1	Corymbia.citriodora	272	20x50
1	Corymbia.citriodora	294	20x50
1	Corymbia.citriodora	315	20x50
1	Corymbia.citriodora	329	20x50
1	Corymbia.citriodora	364	20x50
1	Corymbia.citriodora	377	20x50
1	Corymbia.citriodora	487	20x50
1	Corymbia.citriodora	489	20x50
1	Corymbia.citriodora	542	20x50
1	Eucalyptus.acmenoides	52	20x50
1	Eucalyptus.acmenoides	52	20x50
1	Eucalyptus.acmenoides	58	20x50
1	Eucalyptus.acmenoides	59	20x50
1	Eucalyptus.acmenoides	65	20x50
1	Eucalyptus.acmenoides	89	20x50
1	Eucalyptus.acmenoides	259	20x50
1	Eucalyptus.acmenoides	348	20x50
1	Eucalyptus.crebra	172	20x50
1	Eucalyptus.crebra	178	20x50
1	Eucalyptus.crebra	198	20x50
1	Eucalyptus.crebra	243	20x50
1	Eucalyptus.crebra	258	20x50
1	Eucalyptus.crebra	285	20x50
1	Eucalyptus.crebra	290	20x50
1	Eucalyptus.crebra	349	20x50
1	Eucalyptus.exserta	186	20x50
2	Allocasuarina.littoralis	5.7	1x50
2	Banksia.robur	6.3	1x50
2	Banksia.robur	6.7	1x50
2	Banksia.robur	7.1	1x50
2	Banksia.robur	7.2	1x50
2	Banksia.robur	7.3	1x50
2	Banksia.robur	7.5	1x50
2	Banksia.robur	8.9	1x50
2	Banksia.robur	10.7	1x50
2	Banksia.robur	10.9	1x50
2	Banksia.robur	10.9	1x50
2	Banksia.robur	13.7	1x50
2	Banksia.robur	14.7	1x50
2	Banksia.robur	14.8	1x50
2	Banksia.robur	16.6	1x50
2	Banksia.robur	16.7	1x50
2	Banksia.robur	16.8	1x50
2	Banksia.robur	16.8	1x50
2	Banksia.robur	16.9	1x50
2	Banksia.robur	17.8	1x50
2	Banksia.robur	19.5	1x50
2	Banksia.robur	19.5	1x50
2	Banksia.robur	19.8	1x50
2	Banksia.robur	20	1x50
2	Banksia.robur	20.8	1x50
2	Banksia.robur	20.9	1x50
2	Banksia.robur	21.6	1x50
2	Banksia.robur	21.6	1x50
2	Banksia.robur	21.7	1x50
2	Banksia.robur	21.8	1x50
2	Banksia.robur	22.4	1x50
2	Banksia.robur	23.5	1x50
2	Banksia.robur	24.1	1x50
2	Banksia.robur	25.2	1x50
2	Banksia.robur	25.4	1x50
2	Banksia.robur	26	1x50
2	Banksia.robur	26.5	1x50
2	Banksia.robur	26.5	1x50
2	Banksia.robur	26.7	1x50
2	Banksia.robur	26.8	1x50
2	Banksia.robur	27.1	1x50
2	Banksia.robur	29	1x50
2	Banksia.robur	29.5	1x50
2	Banksia.robur	30.7	1x50
2	Banksia.robur	30.9	1x50
2	Banksia.robur	32.1	1x50
2	Banksia.robur	33.4	1x50
2	Banksia.robur	37.6	1x50
2	Banksia.robur	39.3	1x50
2	Banksia.robur	42	1x50
2	Banksia.robur	44.5	1x50
2	Banksia.robur	182	20x50
2	Hakea.actites	28.5	1x50
2	Hakea.actites	52	20x50
2	Hakea.actites	65	20x50
2	Leptospermum.polygalifolium	6.7	1x50
2	Leptospermum.polygalifolium	28.3	1x50
2	Leptospermum.polygalifolium	28.8	1x50
2	Leucopogon.leptospermoides	7.3	1x50
2	Leucopogon.leptospermoides	7.6	1x50
2	Leucopogon.leptospermoides	12.6	1x50
2	Lophostemon.suaveolens	53	20x50
2	Lophostemon.suaveolens	72	20x50
2	Lophostemon.suaveolens	199	20x50
2	Lophostemon.suaveolens	256	20x50
2	Lophostemon.suaveolens	509	20x50
2	Melaleuca.cheelii	6.1	1x50
2	Melaleuca.cheelii	11.2	1x50
2	Melaleuca.cheelii	12.4	1x50
2	Melaleuca.cheelii	13	1x50
2	Melaleuca.cheelii	13.5	1x50
2	Melaleuca.cheelii	13.7	1x50
2	Melaleuca.cheelii	16.6	1x50
2	Melaleuca.cheelii	17.6	1x50
2	Melaleuca.cheelii	18.1	1x50
2	Melaleuca.cheelii	19.7	1x50
2	Melaleuca.cheelii	20.5	1x50
2	Melaleuca.cheelii	20.6	1x50
2	Melaleuca.cheelii	29	1x50
2	Melaleuca.cheelii	29.5	1x50
2	Melaleuca.cheelii	39.1	1x50
2	Melaleuca.cheelii	48.4	1x50
2	Melaleuca.cheelii	52	20x50
2	Melaleuca.cheelii	52	20x50
2	Melaleuca.cheelii	52.7	20x50
2	Melaleuca.cheelii	53	20x50
2	Melaleuca.cheelii	53.6	20x50
2	Melaleuca.cheelii	54	20x50
2	Melaleuca.cheelii	54	20x50
2	Melaleuca.cheelii	54	20x50
2	Melaleuca.cheelii	54.6	20x50
2	Melaleuca.cheelii	55.2	20x50
2	Melaleuca.cheelii	56	20x50
2	Melaleuca.cheelii	60	20x50
2	Melaleuca.cheelii	60	20x50
2	Melaleuca.cheelii	61	20x50
2	Melaleuca.cheelii	63	20x50
2	Melaleuca.cheelii	65	20x50
2	Melaleuca.cheelii	67	20x50
2	Melaleuca.cheelii	67	20x50
2	Melaleuca.cheelii	67	20x50
2	Melaleuca.cheelii	67	20x50
2	Melaleuca.cheelii	72	20x50
2	Melaleuca.cheelii	72	20x50
2	Melaleuca.cheelii	73	20x50
2	Melaleuca.cheelii	76.4	20x50
2	Melaleuca.cheelii	78	20x50
2	Melaleuca.cheelii	79	20x50
2	Melaleuca.cheelii	79.5	20x50
2	Melaleuca.cheelii	80	20x50
2	Melaleuca.cheelii	80	20x50
2	Melaleuca.cheelii	83	20x50
2	Melaleuca.cheelii	84	20x50
2	Melaleuca.cheelii	84	20x50
2	Melaleuca.cheelii	90	20x50
2	Melaleuca.cheelii	90	20x50
2	Melaleuca.cheelii	96	20x50
2	Melaleuca.cheelii	97	20x50
2	Melaleuca.cheelii	98	20x50
2	Melaleuca.cheelii	102	20x50
2	Melaleuca.cheelii	104	20x50
2	Melaleuca.cheelii	104	20x50
2	Melaleuca.cheelii	104	20x50
2	Melaleuca.cheelii	105	20x50
2	Melaleuca.cheelii	106	20x50
2	Melaleuca.cheelii	106	20x50
2	Melaleuca.cheelii	110	20x50
2	Melaleuca.cheelii	112	20x50
2	Melaleuca.cheelii	115	20x50
2	Melaleuca.cheelii	117	20x50
2	Melaleuca.cheelii	119	20x50
2	Melaleuca.cheelii	122	20x50
2	Melaleuca.cheelii	124	20x50
2	Melaleuca.cheelii	134	20x50
2	Melaleuca.cheelii	140	20x50
2	Melaleuca.cheelii	142	20x50
2	Melaleuca.cheelii	155	20x50
2	Melaleuca.cheelii	191	20x50
2	Melaleuca.cheelii	194	20x50
2	Melaleuca.cheelii	207	20x50
2	Melaleuca.cheelii	210	20x50
2	Melaleuca.cheelii	212	20x50
2	Melaleuca.cheelii	213	20x50
2	Melaleuca.cheelii	261	20x50
2	Melaleuca.cheelii	288	20x50
2	Melaleuca.cheelii	297	20x50
2	Melaleuca.quinquenervia	14.5	1x50
2	Melaleuca.quinquenervia	14.5	1x50
2	Melaleuca.thymifolia	5	1x50
2	Melaleuca.thymifolia	5.1	1x50
2	Melaleuca.thymifolia	5.1	1x50
2	Melaleuca.thymifolia	5.1	1x50
2	Melaleuca.thymifolia	5.2	1x50
2	Melaleuca.thymifolia	5.3	1x50
2	Melaleuca.thymifolia	5.3	1x50
2	Melaleuca.thymifolia	5.3	1x50
2	Melaleuca.thymifolia	5.4	1x50
2	Melaleuca.thymifolia	5.5	1x50
2	Melaleuca.thymifolia	5.5	1x50
2	Melaleuca.thymifolia	5.6	1x50
2	Melaleuca.thymifolia	6.1	1x50
2	Melaleuca.thymifolia	6.3	1x50
2	Melaleuca.thymifolia	6.4	1x50
2	Melaleuca.thymifolia	6.5	1x50
2	Melaleuca.thymifolia	6.5	1x50
2	Melaleuca.thymifolia	7.3	1x50
2	Melaleuca.thymifolia	7.5	1x50
2	Melaleuca.thymifolia	8	1x50
2	Melaleuca.thymifolia	8.6	1x50
2	Melaleuca.thymifolia	9.6	1x50
2	Melaleuca.thymifolia	9.6	1x50
2	Melaleuca.thymifolia	15.2	1x50
2	Melaleuca.thymifolia	19	1x50
2	Melaleuca.thymifolia	75	20x50
3	Banksia.robur	5.3	1x50
3	Banksia.robur	5.3	1x50
3	Banksia.robur	5.3	1x50
3	Banksia.robur	5.3	1x50
3	Banksia.robur	5.3	1x50
3	Banksia.robur	5.7	1x50
3	Banksia.robur	5.7	1x50
3	Banksia.robur	5.7	1x50
3	Banksia.robur	5.7	1x50
3	Banksia.robur	5.7	1x50
3	Banksia.robur	5.9	1x50
3	Banksia.robur	5.9	1x50
3	Banksia.robur	5.9	1x50
3	Banksia.robur	5.9	1x50
3	Banksia.robur	5.9	1x50
3	Banksia.robur	6.1	1x50
3	Banksia.robur	6.1	1x50
3	Banksia.robur	6.1	1x50
3	Banksia.robur	6.1	1x50
3	Banksia.robur	6.1	1x50
3	Banksia.robur	6.1	1x50
3	Banksia.robur	6.1	1x50
3	Banksia.robur	6.1	1x50
3	Banksia.robur	6.1	1x50
3	Banksia.robur	6.1	1x50
3	Banksia.robur	6.2	1x50
3	Banksia.robur	6.2	1x50
3	Banksia.robur	6.2	1x50
3	Banksia.robur	6.2	1x50
3	Banksia.robur	6.2	1x50
3	Banksia.robur	6.2	1x50
3	Banksia.robur	6.2	1x50
3	Banksia.robur	6.2	1x50
3	Banksia.robur	6.2	1x50
3	Banksia.robur	6.2	1x50
3	Banksia.robur	6.3	1x50
3	Banksia.robur	6.3	1x50
3	Banksia.robur	6.3	1x50
3	Banksia.robur	6.3	1x50
3	Banksia.robur	6.3	1x50
3	Banksia.robur	6.3	1x50
3	Banksia.robur	6.3	1x50
3	Banksia.robur	6.3	1x50
3	Banksia.robur	6.3	1x50
3	Banksia.robur	6.3	1x50
3	Banksia.robur	6.4	1x50
3	Banksia.robur	6.4	1x50
3	Banksia.robur	6.4	1x50
3	Banksia.robur	6.4	1x50
3	Banksia.robur	6.4	1x50
3	Banksia.robur	6.5	1x50
3	Banksia.robur	6.5	1x50
3	Banksia.robur	6.5	1x50
3	Banksia.robur	6.5	1x50
3	Banksia.robur	6.5	1x50
3	Banksia.robur	6.6	1x50
3	Banksia.robur	6.6	1x50
3	Banksia.robur	6.6	1x50
3	Banksia.robur	6.6	1x50
3	Banksia.robur	6.6	1x50
3	Banksia.robur	6.8	1x50
3	Banksia.robur	6.8	1x50
3	Banksia.robur	6.8	1x50
3	Banksia.robur	6.8	1x50
3	Banksia.robur	6.8	1x50
3	Banksia.robur	6.8	1x50
3	Banksia.robur	6.8	1x50
3	Banksia.robur	6.8	1x50
3	Banksia.robur	6.8	1x50
3	Banksia.robur	6.8	1x50
3	Banksia.robur	6.9	1x50
3	Banksia.robur	6.9	1x50
3	Banksia.robur	6.9	1x50
3	Banksia.robur	6.9	1x50
3	Banksia.robur	6.9	1x50
3	Banksia.robur	6.9	1x50
3	Banksia.robur	6.9	1x50
3	Banksia.robur	6.9	1x50
3	Banksia.robur	6.9	1x50
3	Banksia.robur	6.9	1x50
3	Banksia.robur	7.3	1x50
3	Banksia.robur	7.3	1x50
3	Banksia.robur	7.3	1x50
3	Banksia.robur	7.3	1x50
3	Banksia.robur	7.3	1x50
3	Banksia.robur	7.3	1x50
3	Banksia.robur	7.3	1x50
3	Banksia.robur	7.3	1x50
3	Banksia.robur	7.3	1x50
3	Banksia.robur	7.3	1x50
3	Banksia.robur	7.4	1x50
3	Banksia.robur	7.4	1x50
3	Banksia.robur	7.4	1x50
3	Banksia.robur	7.4	1x50
3	Banksia.robur	7.4	1x50
3	Banksia.robur	7.7	1x50
3	Banksia.robur	7.7	1x50
3	Banksia.robur	7.7	1x50
3	Banksia.robur	7.7	1x50
3	Banksia.robur	7.7	1x50
3	Banksia.robur	8.1	1x50
3	Banksia.robur	8.1	1x50
3	Banksia.robur	8.1	1x50
3	Banksia.robur	8.1	1x50
3	Banksia.robur	8.1	1x50
3	Banksia.robur	8.3	1x50
3	Banksia.robur	8.3	1x50
3	Banksia.robur	8.3	1x50
3	Banksia.robur	8.3	1x50
3	Banksia.robur	8.3	1x50
3	Banksia.robur	8.4	1x50
3	Banksia.robur	8.4	1x50
3	Banksia.robur	8.4	1x50
3	Banksia.robur	8.4	1x50
3	Banksia.robur	8.4	1x50
3	Banksia.robur	8.6	1x50
3	Banksia.robur	8.6	1x50
3	Banksia.robur	8.6	1x50
3	Banksia.robur	8.6	1x50
3	Banksia.robur	8.6	1x50
3	Banksia.robur	8.7	1x50
3	Banksia.robur	8.7	1x50
3	Banksia.robur	8.7	1x50
3	Banksia.robur	8.7	1x50
3	Banksia.robur	8.7	1x50
3	Banksia.robur	8.7	1x50
3	Banksia.robur	8.7	1x50
3	Banksia.robur	8.7	1x50
3	Banksia.robur	8.7	1x50
3	Banksia.robur	8.7	1x50
3	Banksia.robur	8.7	1x50
3	Banksia.robur	8.7	1x50
3	Banksia.robur	8.7	1x50
3	Banksia.robur	8.7	1x50
3	Banksia.robur	8.7	1x50
3	Banksia.robur	8.7	1x50
3	Banksia.robur	8.7	1x50
3	Banksia.robur	8.7	1x50
3	Banksia.robur	8.7	1x50
3	Banksia.robur	8.7	1x50
3	Banksia.robur	8.8	1x50
3	Banksia.robur	8.8	1x50
3	Banksia.robur	8.8	1x50
3	Banksia.robur	8.8	1x50
3	Banksia.robur	8.8	1x50
3	Banksia.robur	8.8	1x50
3	Banksia.robur	8.8	1x50
3	Banksia.robur	8.8	1x50
3	Banksia.robur	8.8	1x50
3	Banksia.robur	8.8	1x50
3	Banksia.robur	8.9	1x50
3	Banksia.robur	8.9	1x50
3	Banksia.robur	8.9	1x50
3	Banksia.robur	8.9	1x50
3	Banksia.robur	8.9	1x50
3	Banksia.robur	8.9	1x50
3	Banksia.robur	8.9	1x50
3	Banksia.robur	8.9	1x50
3	Banksia.robur	8.9	1x50
3	Banksia.robur	8.9	1x50
3	Banksia.robur	8.9	1x50
3	Banksia.robur	8.9	1x50
3	Banksia.robur	8.9	1x50
3	Banksia.robur	8.9	1x50
3	Banksia.robur	8.9	1x50
3	Banksia.robur	9.1	1x50
3	Banksia.robur	9.1	1x50
3	Banksia.robur	9.1	1x50
3	Banksia.robur	9.1	1x50
3	Banksia.robur	9.1	1x50
3	Banksia.robur	9.3	1x50
3	Banksia.robur	9.3	1x50
3	Banksia.robur	9.3	1x50
3	Banksia.robur	9.3	1x50
3	Banksia.robur	9.3	1x50
3	Banksia.robur	9.5	1x50
3	Banksia.robur	9.5	1x50
3	Banksia.robur	9.5	1x50
3	Banksia.robur	9.5	1x50
3	Banksia.robur	9.5	1x50
3	Banksia.robur	9.5	1x50
3	Banksia.robur	9.5	1x50
3	Banksia.robur	9.5	1x50
3	Banksia.robur	9.5	1x50
3	Banksia.robur	9.5	1x50
3	Banksia.robur	9.6	1x50
3	Banksia.robur	9.6	1x50
3	Banksia.robur	9.6	1x50
3	Banksia.robur	9.6	1x50
3	Banksia.robur	9.6	1x50
3	Banksia.robur	9.7	1x50
3	Banksia.robur	9.7	1x50
3	Banksia.robur	9.7	1x50
3	Banksia.robur	9.7	1x50
3	Banksia.robur	9.7	1x50
3	Banksia.robur	9.8	1x50
3	Banksia.robur	9.8	1x50
3	Banksia.robur	9.8	1x50
3	Banksia.robur	9.8	1x50
3	Banksia.robur	9.8	1x50
3	Banksia.robur	9.8	1x50
3	Banksia.robur	9.8	1x50
3	Banksia.robur	9.8	1x50
3	Banksia.robur	9.8	1x50
3	Banksia.robur	9.8	1x50
3	Banksia.robur	9.9	1x50
3	Banksia.robur	9.9	1x50
3	Banksia.robur	9.9	1x50
3	Banksia.robur	9.9	1x50
3	Banksia.robur	9.9	1x50
3	Banksia.robur	10	1x50
3	Banksia.robur	10	1x50
3	Banksia.robur	10	1x50
3	Banksia.robur	10	1x50
3	Banksia.robur	10	1x50
3	Banksia.robur	10	1x50
3	Banksia.robur	10	1x50
3	Banksia.robur	10	1x50
3	Banksia.robur	10	1x50
3	Banksia.robur	10	1x50
3	Banksia.robur	10.1	1x50
3	Banksia.robur	10.1	1x50
3	Banksia.robur	10.1	1x50
3	Banksia.robur	10.1	1x50
3	Banksia.robur	10.1	1x50
3	Banksia.robur	11.1	1x50
3	Banksia.robur	11.1	1x50
3	Banksia.robur	11.1	1x50
3	Banksia.robur	11.1	1x50
3	Banksia.robur	11.1	1x50
3	Banksia.robur	11.1	1x50
3	Banksia.robur	11.1	1x50
3	Banksia.robur	11.1	1x50
3	Banksia.robur	11.1	1x50
3	Banksia.robur	11.1	1x50
3	Banksia.robur	11.3	1x50
3	Banksia.robur	11.3	1x50
3	Banksia.robur	11.3	1x50
3	Banksia.robur	11.3	1x50
3	Banksia.robur	11.3	1x50
3	Banksia.robur	11.4	1x50
3	Banksia.robur	11.4	1x50
3	Banksia.robur	11.4	1x50
3	Banksia.robur	11.4	1x50
3	Banksia.robur	11.4	1x50
3	Banksia.robur	11.4	1x50
3	Banksia.robur	11.4	1x50
3	Banksia.robur	11.4	1x50
3	Banksia.robur	11.4	1x50
3	Banksia.robur	11.4	1x50
3	Banksia.robur	11.5	1x50
3	Banksia.robur	11.5	1x50
3	Banksia.robur	11.5	1x50
3	Banksia.robur	11.5	1x50
3	Banksia.robur	11.5	1x50
3	Banksia.robur	11.6	1x50
3	Banksia.robur	11.6	1x50
3	Banksia.robur	11.6	1x50
3	Banksia.robur	11.6	1x50
3	Banksia.robur	11.6	1x50
3	Banksia.robur	11.6	1x50
3	Banksia.robur	11.6	1x50
3	Banksia.robur	11.6	1x50
3	Banksia.robur	11.6	1x50
3	Banksia.robur	11.6	1x50
3	Banksia.robur	12.2	1x50
3	Banksia.robur	12.2	1x50
3	Banksia.robur	12.2	1x50
3	Banksia.robur	12.2	1x50
3	Banksia.robur	12.2	1x50
3	Banksia.robur	12.4	1x50
3	Banksia.robur	12.4	1x50
3	Banksia.robur	12.4	1x50
3	Banksia.robur	12.4	1x50
3	Banksia.robur	12.4	1x50
3	Banksia.robur	12.8	1x50
3	Banksia.robur	12.8	1x50
3	Banksia.robur	12.8	1x50
3	Banksia.robur	12.8	1x50
3	Banksia.robur	12.8	1x50
3	Banksia.robur	12.9	1x50
3	Banksia.robur	12.9	1x50
3	Banksia.robur	12.9	1x50
3	Banksia.robur	12.9	1x50
3	Banksia.robur	12.9	1x50
3	Banksia.robur	13.1	1x50
3	Banksia.robur	13.1	1x50
3	Banksia.robur	13.1	1x50
3	Banksia.robur	13.1	1x50
3	Banksia.robur	13.1	1x50
3	Banksia.robur	13.5	1x50
3	Banksia.robur	13.5	1x50
3	Banksia.robur	13.5	1x50
3	Banksia.robur	13.5	1x50
3	Banksia.robur	13.5	1x50
3	Banksia.robur	15.1	1x50
3	Banksia.robur	15.1	1x50
3	Banksia.robur	15.1	1x50
3	Banksia.robur	15.1	1x50
3	Banksia.robur	15.1	1x50
3	Banksia.robur	16.1	1x50
3	Banksia.robur	16.1	1x50
3	Banksia.robur	16.1	1x50
3	Banksia.robur	16.1	1x50
3	Banksia.robur	16.1	1x50
3	Banksia.robur	16.5	1x50
3	Banksia.robur	16.5	1x50
3	Banksia.robur	16.5	1x50
3	Banksia.robur	16.5	1x50
3	Banksia.robur	16.5	1x50
3	Banksia.robur	17.9	1x50
3	Banksia.robur	17.9	1x50
3	Banksia.robur	17.9	1x50
3	Banksia.robur	17.9	1x50
3	Banksia.robur	17.9	1x50
3	Banksia.robur	18.6	1x50
3	Banksia.robur	18.6	1x50
3	Banksia.robur	18.6	1x50
3	Banksia.robur	18.6	1x50
3	Banksia.robur	18.6	1x50
4	Banksia.oblongifolia	5.1	1x50
4	Banksia.oblongifolia	5.2	1x50
4	Banksia.oblongifolia	5.2	1x50
4	Banksia.oblongifolia	5.4	1x50
4	Banksia.oblongifolia	5.6	1x50
4	Banksia.oblongifolia	6.8	1x50
4	Banksia.oblongifolia	7.9	1x50
4	Banksia.oblongifolia	11.6	1x50
4	Banksia.oblongifolia	11.6	1x50
4	Banksia.oblongifolia	12.2	1x50
4	Banksia.oblongifolia	12.6	1x50
4	Banksia.oblongifolia	13.5	1x50
4	Banksia.oblongifolia	13.7	1x50
4	Banksia.oblongifolia	14	1x50
4	Banksia.oblongifolia	15.5	1x50
4	Banksia.oblongifolia	16.2	1x50
4	Banksia.oblongifolia	19.3	1x50
4	Banksia.oblongifolia	20.7	1x50
4	Banksia.oblongifolia	20.7	1x50
4	Banksia.oblongifolia	21.7	1x50
4	Banksia.oblongifolia	23.2	1x50
4	Banksia.oblongifolia	23.6	1x50
4	Banksia.oblongifolia	26.9	1x50
4	Banksia.oblongifolia	27.1	1x50
4	Banksia.oblongifolia	28	1x50
4	Banksia.oblongifolia	33.3	1x50
4	Banksia.oblongifolia	41.4	1x50
4	Boronia.rosmarinifolia	5.5	1x50
4	Boronia.rosmarinifolia	7.1	1x50
4	Boronia.rosmarinifolia	8.4	1x50
4	Corymbia.trachyphloia	70	20x50
4	Corymbia.trachyphloia	71	20x50
4	Corymbia.trachyphloia	74	20x50
4	Corymbia.trachyphloia	78	20x50
4	Corymbia.trachyphloia	83	20x50
4	Corymbia.trachyphloia	94	20x50
4	Corymbia.trachyphloia	94	20x50
4	Corymbia.trachyphloia	115	20x50
4	Corymbia.trachyphloia	119	20x50
4	Corymbia.trachyphloia	152	20x50
4	Corymbia.trachyphloia	152	20x50
4	Corymbia.trachyphloia	160	20x50
4	Eucalyptus.latisinensis	50	20x50
4	Eucalyptus.latisinensis	50	20x50
4	Eucalyptus.latisinensis	56	20x50
4	Eucalyptus.latisinensis	57	20x50
4	Eucalyptus.latisinensis	57	20x50
4	Eucalyptus.latisinensis	57	20x50
4	Eucalyptus.latisinensis	58	20x50
4	Eucalyptus.latisinensis	59	20x50
4	Eucalyptus.latisinensis	60	20x50
4	Eucalyptus.latisinensis	62	20x50
4	Eucalyptus.latisinensis	62	20x50
4	Eucalyptus.latisinensis	62	20x50
4	Eucalyptus.latisinensis	66	20x50
4	Eucalyptus.latisinensis	66	20x50
4	Eucalyptus.latisinensis	67	20x50
4	Eucalyptus.latisinensis	67	20x50
4	Eucalyptus.latisinensis	70	20x50
4	Eucalyptus.latisinensis	72	20x50
4	Eucalyptus.latisinensis	72	20x50
4	Eucalyptus.latisinensis	75	20x50
4	Eucalyptus.latisinensis	76	20x50
4	Eucalyptus.latisinensis	76	20x50
4	Eucalyptus.latisinensis	76	20x50
4	Eucalyptus.latisinensis	78	20x50
4	Eucalyptus.latisinensis	78	20x50
4	Eucalyptus.latisinensis	79	20x50
4	Eucalyptus.latisinensis	79	20x50
4	Eucalyptus.latisinensis	80	20x50
4	Eucalyptus.latisinensis	81	20x50
4	Eucalyptus.latisinensis	82	20x50
4	Eucalyptus.latisinensis	83	20x50
4	Eucalyptus.latisinensis	83	20x50
4	Eucalyptus.latisinensis	84	20x50
4	Eucalyptus.latisinensis	84	20x50
4	Eucalyptus.latisinensis	86	20x50
4	Eucalyptus.latisinensis	87	20x50
4	Eucalyptus.latisinensis	87	20x50
4	Eucalyptus.latisinensis	88	20x50
4	Eucalyptus.latisinensis	88	20x50
4	Eucalyptus.latisinensis	89	20x50
4	Eucalyptus.latisinensis	91	20x50
4	Eucalyptus.latisinensis	92	20x50
4	Eucalyptus.latisinensis	95	20x50
4	Eucalyptus.latisinensis	95	20x50
4	Eucalyptus.latisinensis	95	20x50
4	Eucalyptus.latisinensis	96	20x50
4	Eucalyptus.latisinensis	98	20x50
4	Eucalyptus.latisinensis	98	20x50
4	Eucalyptus.latisinensis	98	20x50
4	Eucalyptus.latisinensis	99	20x50
4	Eucalyptus.latisinensis	100	20x50
4	Eucalyptus.latisinensis	112	20x50
4	Eucalyptus.latisinensis	114	20x50
4	Eucalyptus.latisinensis	114	20x50
4	Eucalyptus.latisinensis	117	20x50
4	Eucalyptus.latisinensis	118	20x50
4	Eucalyptus.latisinensis	118	20x50
4	Eucalyptus.latisinensis	133	20x50
4	Eucalyptus.latisinensis	144	20x50
4	Eucalyptus.latisinensis	150	20x50
4	Eucalyptus.latisinensis	151	20x50
4	Eucalyptus.latisinensis	161	20x50
4	Eucalyptus.latisinensis	175	20x50
4	Eucalyptus.latisinensis	193	20x50
4	Eucalyptus.latisinensis	193	20x50
4	Hakea.actites	15.6	1x50
4	Hakea.actites	30.1	1x50
4	Hakea.actites	30.8	1x50
4	Hakea.actites	31.1	1x50
4	Hakea.actites	36.7	1x50
4	Hakea.actites	38.3	1x50
4	Hakea.actites	41.6	1x50
4	Hakea.actites	45.9	1x50
4	Hakea.actites	51	20x50
4	Hakea.actites	51.3	20x50
4	Hakea.actites	55.1	20x50
4	Hakea.actites	58	20x50
4	Hakea.actites	60	20x50
4	Hakea.actites	61.2	20x50
4	Hakea.actites	62	20x50
4	Hakea.actites	64	20x50
4	Hakea.actites	70.7	20x50
4	Hakea.actites	77	20x50
4	Leptospermum.polygalifolium	5.2	1x50
4	Leptospermum.polygalifolium	6.1	1x50
4	Leptospermum.polygalifolium	7.2	1x50
4	Leptospermum.polygalifolium	7.2	1x50
4	Leptospermum.polygalifolium	7.4	1x50
4	Leptospermum.polygalifolium	7.8	1x50
4	Leptospermum.polygalifolium	7.9	1x50
4	Leptospermum.polygalifolium	8.2	1x50
4	Leptospermum.polygalifolium	8.3	1x50
4	Leptospermum.polygalifolium	8.5	1x50
4	Leptospermum.polygalifolium	9.1	1x50
4	Leptospermum.polygalifolium	9.5	1x50
4	Leptospermum.polygalifolium	9.6	1x50
4	Leptospermum.polygalifolium	9.9	1x50
4	Leptospermum.polygalifolium	10.2	1x50
4	Leptospermum.polygalifolium	10.3	1x50
4	Leptospermum.polygalifolium	10.3	1x50
4	Leptospermum.polygalifolium	10.6	1x50
4	Leptospermum.polygalifolium	10.6	1x50
4	Leptospermum.polygalifolium	10.7	1x50
4	Leptospermum.polygalifolium	10.8	1x50
4	Leptospermum.polygalifolium	11.3	1x50
4	Leptospermum.polygalifolium	11.6	1x50
4	Leptospermum.polygalifolium	11.6	1x50
4	Leptospermum.polygalifolium	12.3	1x50
4	Leptospermum.polygalifolium	12.5	1x50
4	Leptospermum.polygalifolium	12.6	1x50
4	Leptospermum.polygalifolium	12.7	1x50
4	Leptospermum.polygalifolium	12.9	1x50
4	Leptospermum.polygalifolium	13.7	1x50
4	Leptospermum.polygalifolium	13.8	1x50
4	Leptospermum.polygalifolium	14.3	1x50
4	Leptospermum.polygalifolium	15.2	1x50
4	Leptospermum.polygalifolium	15.5	1x50
4	Leptospermum.polygalifolium	15.5	1x50
4	Leptospermum.polygalifolium	15.7	1x50
4	Leptospermum.polygalifolium	15.8	1x50
4	Leptospermum.polygalifolium	16.9	1x50
4	Leptospermum.polygalifolium	17.6	1x50
4	Leptospermum.polygalifolium	17.7	1x50
4	Leptospermum.polygalifolium	18.3	1x50
4	Leptospermum.polygalifolium	18.9	1x50
4	Leptospermum.polygalifolium	19.3	1x50
4	Leptospermum.polygalifolium	19.3	1x50
4	Leptospermum.polygalifolium	19.9	1x50
4	Leptospermum.polygalifolium	21	1x50
4	Leptospermum.polygalifolium	21	1x50
4	Leptospermum.polygalifolium	21.4	1x50
4	Leptospermum.polygalifolium	21.6	1x50
4	Leptospermum.polygalifolium	22.9	1x50
4	Leptospermum.polygalifolium	23.4	1x50
4	Leptospermum.polygalifolium	24.2	1x50
4	Leptospermum.polygalifolium	25.1	1x50
4	Leptospermum.polygalifolium	25.9	1x50
4	Leptospermum.polygalifolium	26.3	1x50
4	Leptospermum.polygalifolium	26.9	1x50
4	Leptospermum.polygalifolium	28.1	1x50
4	Leptospermum.polygalifolium	32.3	1x50
4	Leptospermum.polygalifolium	33.2	1x50
4	Leptospermum.trinervium	7.1	1x50
4	Leptospermum.trinervium	12.1	1x50
4	Leptospermum.trinervium	50	20x50
4	Leptospermum.trinervium	50	20x50
4	Leptospermum.trinervium	51	20x50
4	Leptospermum.trinervium	52	20x50
4	Leptospermum.trinervium	55.7	20x50
4	Leptospermum.trinervium	56	20x50
4	Leptospermum.trinervium	61	20x50
4	Leptospermum.trinervium	64	20x50
4	Leucopogon.sp..(Burrum.Heads.A.R.Bean.7802)	5	1x50
4	Leucopogon.sp..(Burrum.Heads.A.R.Bean.7802)	5.2	1x50
4	Leucopogon.sp..(Burrum.Heads.A.R.Bean.7802)	5.5	1x50
4	Leucopogon.sp..(Burrum.Heads.A.R.Bean.7802)	5.9	1x50
4	Leucopogon.sp..(Burrum.Heads.A.R.Bean.7802)	6.5	1x50
4	Leucopogon.sp..(Burrum.Heads.A.R.Bean.7802)	7.1	1x50
4	Leucopogon.sp..(Burrum.Heads.A.R.Bean.7802)	7.5	1x50
4	Leucopogon.sp..(Burrum.Heads.A.R.Bean.7802)	8.8	1x50
4	Leucopogon.sp..(Burrum.Heads.A.R.Bean.7802)	8.8	1x50
4	Leucopogon.sp..(Burrum.Heads.A.R.Bean.7802)	8.9	1x50
4	Leucopogon.sp..(Burrum.Heads.A.R.Bean.7802)	9.7	1x50
4	Leucopogon.sp..(Burrum.Heads.A.R.Bean.7802)	10.6	1x50
4	Leucopogon.sp..(Burrum.Heads.A.R.Bean.7802)	11.4	1x50
4	Leucopogon.sp..(Burrum.Heads.A.R.Bean.7802)	13.4	1x50
4	Leucopogon.sp..(Burrum.Heads.A.R.Bean.7802)	14.8	1x50
4	Leucopogon.sp..(Burrum.Heads.A.R.Bean.7802)	17.5	1x50
4	Leucopogon.sp..(Burrum.Heads.A.R.Bean.7802)	21.1	1x50
4	Melaleuca.nodosa	7.9	1x50
4	Melaleuca.nodosa	9.2	1x50
4	Melaleuca.nodosa	10.8	1x50
4	Melaleuca.nodosa	16.5	1x50
4	Melaleuca.nodosa	21	1x50
4	Melaleuca.nodosa	29.5	1x50
4	Micromyrtus.littoralis	5.2	1x50
4	Micromyrtus.littoralis	5.2	1x50
4	Micromyrtus.littoralis	5.6	1x50
4	Micromyrtus.littoralis	6.4	1x50
4	Micromyrtus.littoralis	7	1x50
4	Micromyrtus.littoralis	7.2	1x50
4	Micromyrtus.littoralis	7.4	1x50
4	Micromyrtus.littoralis	7.8	1x50
4	Micromyrtus.littoralis	8.2	1x50
4	Micromyrtus.littoralis	8.5	1x50
4	Micromyrtus.littoralis	8.6	1x50
4	Micromyrtus.littoralis	9.1	1x50
4	Micromyrtus.littoralis	9.3	1x50
4	Micromyrtus.littoralis	9.3	1x50
4	Micromyrtus.littoralis	9.7	1x50
4	Micromyrtus.littoralis	10.1	1x50
4	Micromyrtus.littoralis	11.4	1x50
4	Micromyrtus.littoralis	11.9	1x50
4	Micromyrtus.littoralis	12.1	1x50
4	Micromyrtus.littoralis	12.9	1x50
4	Micromyrtus.littoralis	13.9	1x50
4	Micromyrtus.littoralis	16.1	1x50
4	Petrophile.shirleyae	5.3	1x50
4	Petrophile.shirleyae	5.5	1x50
4	Petrophile.shirleyae	5.5	1x50
4	Petrophile.shirleyae	5.8	1x50
4	Petrophile.shirleyae	5.8	1x50
4	Petrophile.shirleyae	6.1	1x50
4	Petrophile.shirleyae	6.1	1x50
4	Petrophile.shirleyae	6.2	1x50
4	Petrophile.shirleyae	6.3	1x50
4	Petrophile.shirleyae	6.3	1x50
4	Petrophile.shirleyae	6.5	1x50
4	Petrophile.shirleyae	6.5	1x50
4	Petrophile.shirleyae	6.5	1x50
4	Petrophile.shirleyae	6.7	1x50
4	Petrophile.shirleyae	6.7	1x50
4	Petrophile.shirleyae	6.8	1x50
4	Petrophile.shirleyae	7	1x50
4	Petrophile.shirleyae	7.5	1x50
4	Petrophile.shirleyae	7.5	1x50
4	Petrophile.shirleyae	7.5	1x50
4	Petrophile.shirleyae	7.6	1x50
4	Petrophile.shirleyae	7.7	1x50
4	Petrophile.shirleyae	8.2	1x50
4	Petrophile.shirleyae	8.3	1x50
4	Petrophile.shirleyae	8.3	1x50
4	Petrophile.shirleyae	8.6	1x50
4	Petrophile.shirleyae	9.1	1x50
4	Petrophile.shirleyae	9.1	1x50
4	Petrophile.shirleyae	9.6	1x50
4	Petrophile.shirleyae	9.6	1x50
4	Petrophile.shirleyae	10	1x50
4	Petrophile.shirleyae	10.2	1x50
4	Petrophile.shirleyae	10.5	1x50
4	Petrophile.shirleyae	10.8	1x50
4	Petrophile.shirleyae	11.9	1x50
4	Petrophile.shirleyae	12.1	1x50
4	Petrophile.shirleyae	12.3	1x50
4	Petrophile.shirleyae	13.4	1x50
4	Petrophile.shirleyae	14.3	1x50
4	Petrophile.shirleyae	14.8	1x50
4	Petrophile.shirleyae	17.3	1x50
4	Xylomelum.benthamii	44.4	1x50
4	Xylomelum.benthamii	52	20x50
4	Xylomelum.benthamii	57	20x50
4	Xylomelum.benthamii	62	20x50
4	Xylomelum.benthamii	63	20x50
4	Xylomelum.benthamii	69	20x50
4	Xylomelum.benthamii	71	20x50
4	Xylomelum.benthamii	79	20x50
4	Xylomelum.benthamii	82	20x50
4	Xylomelum.benthamii	88	20x50
4	Xylomelum.benthamii	158	20x50
5	Acacia.suaveolens	5	2x50
5	Acacia.suaveolens	5	2x50
5	Acacia.suaveolens	5.1	2x50
5	Acacia.suaveolens	5.1	2x50
5	Acacia.suaveolens	5.1	2x50
5	Acacia.suaveolens	5.1	2x50
5	Acacia.suaveolens	5.2	2x50
5	Acacia.suaveolens	5.3	2x50
5	Acacia.suaveolens	5.3	2x50
5	Acacia.suaveolens	5.5	2x50
5	Acacia.suaveolens	5.5	2x50
5	Acacia.suaveolens	5.5	2x50
5	Acacia.suaveolens	5.6	2x50
5	Acacia.suaveolens	5.6	2x50
5	Acacia.suaveolens	5.8	2x50
5	Acacia.suaveolens	5.8	2x50
5	Acacia.suaveolens	5.8	2x50
5	Acacia.suaveolens	5.9	2x50
5	Acacia.suaveolens	5.9	2x50
5	Acacia.suaveolens	6	2x50
5	Acacia.suaveolens	6.2	2x50
5	Acacia.suaveolens	6.5	2x50
5	Acacia.suaveolens	6.6	2x50
5	Acacia.suaveolens	6.6	2x50
5	Acacia.suaveolens	6.8	2x50
5	Acacia.suaveolens	6.9	2x50
5	Acacia.suaveolens	7	2x50
5	Acacia.suaveolens	7.1	2x50
5	Acacia.suaveolens	8.3	2x50
5	Allocasuarina.littoralis	6.9	2x50
5	Allocasuarina.littoralis	7.7	2x50
5	Allocasuarina.littoralis	7.7	2x50
5	Allocasuarina.littoralis	9.5	2x50
5	Banksia.aemula	7.9	2x50
5	Banksia.aemula	8.3	2x50
5	Banksia.aemula	60	20x50
5	Banksia.aemula	130	20x50
5	Banksia.integrifolia	5.5	2x50
5	Banksia.integrifolia	13.5	2x50
5	Corymbia.intermedia	100	20x50
5	Corymbia.intermedia	105	20x50
5	Corymbia.intermedia	110	20x50
5	Corymbia.intermedia	115	20x50
5	Corymbia.intermedia	120	20x50
5	Corymbia.intermedia	135	20x50
5	Corymbia.intermedia	140	20x50
5	Corymbia.intermedia	150	20x50
5	Corymbia.intermedia	155	20x50
5	Corymbia.intermedia	155	20x50
5	Corymbia.intermedia	160	20x50
5	Eucalyptus.pilularis	350	20x50
5	Eucalyptus.pilularis	360	20x50
5	Eucalyptus.pilularis	540	20x50
5	Eucalyptus.pilularis	540	20x50
5	Eucalyptus.pilularis	670	20x50
5	Eucalyptus.pilularis	1060	20x50
5	Eucalyptus.racemosa	130	20x50
5	Eucalyptus.racemosa	190	20x50
5	Eucalyptus.racemosa	260	20x50
5	Eucalyptus.racemosa	270	20x50
5	Eucalyptus.racemosa	300	20x50
5	Eucalyptus.racemosa	310	20x50
5	Eucalyptus.racemosa	310	20x50
5	Eucalyptus.racemosa	390	20x50
5	Eucalyptus.racemosa	400	20x50
5	Eucalyptus.racemosa	470	20x50
5	Monotoca.sp..(Fraser.Island.P.Baxter.777)	135	20x50
5	Xylomelum.benthamii	5.4	2x50
5	Xylomelum.benthamii	7.1	2x50
5	Xylomelum.benthamii	7.5	2x50
5	Xylomelum.benthamii	70	20x50
5	Xylomelum.benthamii	90	20x50
5	Xylomelum.benthamii	90	20x50
5	Xylomelum.benthamii	115	20x50
6	Agathis.robusta	107	20x50
6	Agathis.robusta	132	20x50
6	Agathis.robusta	296	20x50
6	Beilschmiedia.obtusifolia	7.3	1x50
6	Beilschmiedia.obtusifolia	7.3	1x50
6	Beilschmiedia.obtusifolia	10.4	1x50
6	Caesalpinia.scortechinii	17.9	1x50
6	Canarium.australasicum	141	20x50
6	Cinnamomum.baileyanum	129	20x50
6	Cinnamomum.baileyanum	192	20x50
6	Dioscorea.transversa	5.1	1x50
6	Diospyros.ellipticifolia	6.2	1x50
6	Diospyros.ellipticifolia	8.8	1x50
6	Elaeocarpus.eumundi	5.5	1x50
6	Elaeocarpus.eumundi	6.8	1x50
6	Elaeocarpus.grandis	7.2	1x50
6	Endiandra.discolor	5.1	1x50
6	Endiandra.discolor	5.4	1x50
6	Endiandra.discolor	5.6	1x50
6	Endiandra.discolor	6.3	1x50
6	Endiandra.discolor	7.4	1x50
6	Endiandra.discolor	8.7	1x50
6	Endiandra.discolor	12.9	1x50
6	Endiandra.discolor	14	1x50
6	Endiandra.discolor	22	1x50
6	Endiandra.discolor	26.8	1x50
6	Endiandra.discolor	28	1x50
6	Eupomatia.laurina	5.1	1x50
6	Eupomatia.laurina	6.5	1x50
6	Eupomatia.laurina	17.3	1x50
6	Eupomatia.laurina	18.9	1x50
6	Eupomatia.laurina	24.6	1x50
6	Eupomatia.laurina	58.1	20x50
6	Flagellaria.indica	22.5	1x50
6	Guioa.acutifolia	17.7	1x50
6	Guioa.acutifolia	76	20x50
6	Halfordia.kendack	6.9	1x50
6	Hippocratea.barbata	5.7	1x50
6	Hypserpa.decumbens	8.6	1x50
6	Hypserpa.decumbens	13.8	1x50
6	Litsea.reticulata	306	20x50
6	Lophostemon.confertus	543	20x50
6	Lophostemon.confertus	591	20x50
6	Lophostemon.confertus	649	20x50
6	Lophostemon.confertus	655	20x50
6	Lophostemon.confertus	705	20x50
6	Lophostemon.confertus	740	20x50
6	Lophostemon.confertus	876	20x50
6	Lophostemon.confertus	902	20x50
6	Lophostemon.confertus	1091	20x50
6	Lophostemon.confertus	1120	20x50
6	Mischocarpus.australis	7.4	1x50
6	Neolitsea.dealbata	6.1	1x50
6	Neolitsea.dealbata	28.9	1x50
6	Neolitsea.dealbata	75	20x50
6	Neolitsea.dealbata	82	20x50
6	Neolitsea.dealbata	87	20x50
6	Pittosporum.revolutum	8.9	1x50
6	Planchonella.australis	6.8	1x50
6	Planchonella.chartacea	7.6	1x50
6	Rhodamnia.acuminata	34.4	1x50
6	Rhodamnia.acuminata	85.4	20x50
6	Ripogonum.discolor	5.1	1x50
6	Ripogonum.discolor	7.3	1x50
6	Ripogonum.discolor	7.8	1x50
6	Ripogonum.discolor	8.4	1x50
6	Ripogonum.discolor	11.2	1x50
6	Schizomeria.ovata	5.3	1x50
6	Schizomeria.ovata	8.5	1x50
6	Schizomeria.ovata	55	20x50
6	Schizomeria.ovata	65	20x50
6	Schizomeria.ovata	70	20x50
6	Schizomeria.ovata	77	20x50
6	Schizomeria.ovata	78	20x50
6	Schizomeria.ovata	82	20x50
6	Schizomeria.ovata	84	20x50
6	Schizomeria.ovata	86	20x50
6	Schizomeria.ovata	91	20x50
6	Schizomeria.ovata	93	20x50
6	Schizomeria.ovata	137	20x50
6	Schizomeria.ovata	151	20x50
6	Schizomeria.ovata	205	20x50
6	Schizomeria.ovata	390	20x50
6	Schizomeria.ovata	429	20x50
6	Scolopia.braunii	51	20x50
6	Syncarpia.hillii	1250	20x50
6	Synoum.glandulosum	8.7	1x50
6	Synoum.glandulosum	74	20x50
6	Synoum.glandulosum	102	20x50
6	Synoum.glandulosum	128	20x50
6	Synoum.glandulosum	154	20x50
6	Syzygium.corynanthum	53	20x50
6	Syzygium.corynanthum	57	20x50
6	Syzygium.corynanthum	58	20x50
6	Syzygium.corynanthum	77	20x50
6	Syzygium.corynanthum	99	20x50
6	Syzygium.corynanthum	99	20x50
6	Syzygium.corynanthum	115	20x50
6	Syzygium.corynanthum	120	20x50
6	Syzygium.corynanthum	132	20x50
6	Syzygium.corynanthum	270	20x50
6	Syzygium.corynanthum	287	20x50
6	Wilkiea.macrophylla	5.2	1x50
6	Wilkiea.macrophylla	5.2	1x50
6	Wilkiea.macrophylla	6.8	1x50
6	Wilkiea.macrophylla	7.4	1x50
6	Wilkiea.macrophylla	10.1	1x50
6	Wilkiea.macrophylla	11.8	1x50
6	Wilkiea.macrophylla	12.4	1x50
6	Wilkiea.macrophylla	13.4	1x50
6	Wilkiea.macrophylla	23	1x50
6	Wilkiea.macrophylla	28.8	1x50
7	Acacia.disparrima	5.8	2x50
7	Acacia.disparrima	6.8	2x50
7	Acacia.disparrima	7.4	2x50
7	Acacia.disparrima	7.4	2x50
7	Acacia.disparrima	7.5	2x50
7	Acacia.disparrima	10	2x50
7	Acacia.disparrima	10.2	2x50
7	Acacia.disparrima	13.5	2x50
7	Acacia.disparrima	14	2x50
7	Acacia.disparrima	15.3	2x50
7	Acacia.disparrima	16.5	2x50
7	Acacia.disparrima	72	20x50
7	Acacia.disparrima	85	20x50
7	Allocasuarina.littoralis	7.2	2x50
7	Allocasuarina.littoralis	10	2x50
7	Allocasuarina.littoralis	37	2x50
7	Allocasuarina.littoralis	56	20x50
7	Allocasuarina.littoralis	61	20x50
7	Allocasuarina.littoralis	62	20x50
7	Allocasuarina.littoralis	62	20x50
7	Allocasuarina.littoralis	62	20x50
7	Allocasuarina.littoralis	67	20x50
7	Allocasuarina.littoralis	68	20x50
7	Allocasuarina.littoralis	70	20x50
7	Allocasuarina.littoralis	71	20x50
7	Allocasuarina.littoralis	71	20x50
7	Allocasuarina.littoralis	74	20x50
7	Allocasuarina.littoralis	81	20x50
7	Allocasuarina.littoralis	81	20x50
7	Allocasuarina.littoralis	83	20x50
7	Allocasuarina.littoralis	85	20x50
7	Allocasuarina.littoralis	85	20x50
7	Allocasuarina.littoralis	91	20x50
7	Allocasuarina.littoralis	91	20x50
7	Allocasuarina.littoralis	91	20x50
7	Allocasuarina.littoralis	92	20x50
7	Allocasuarina.littoralis	98	20x50
7	Allocasuarina.littoralis	98	20x50
7	Allocasuarina.littoralis	98	20x50
7	Allocasuarina.littoralis	99	20x50
7	Allocasuarina.littoralis	102	20x50
7	Allocasuarina.littoralis	104	20x50
7	Allocasuarina.littoralis	108	20x50
7	Allocasuarina.littoralis	110	20x50
7	Allocasuarina.littoralis	110	20x50
7	Allocasuarina.littoralis	110	20x50
7	Allocasuarina.littoralis	112	20x50
7	Allocasuarina.littoralis	112	20x50
7	Allocasuarina.littoralis	113	20x50
7	Allocasuarina.littoralis	115	20x50
7	Allocasuarina.littoralis	117	20x50
7	Allocasuarina.littoralis	118	20x50
7	Allocasuarina.littoralis	121	20x50
7	Allocasuarina.littoralis	121	20x50
7	Allocasuarina.littoralis	121	20x50
7	Allocasuarina.littoralis	129	20x50
7	Allocasuarina.littoralis	130	20x50
7	Allocasuarina.littoralis	135	20x50
7	Allocasuarina.littoralis	140	20x50
7	Allocasuarina.littoralis	141	20x50
7	Allocasuarina.littoralis	142	20x50
7	Allocasuarina.littoralis	144	20x50
7	Allocasuarina.littoralis	150	20x50
7	Allocasuarina.littoralis	153	20x50
7	Alphitonia.excelsa	6.4	2x50
7	Alphitonia.excelsa	6.7	2x50
7	Alphitonia.excelsa	14.1	2x50
7	Angophora.leiocarpa	170	20x50
7	Angophora.leiocarpa	276	20x50
7	Angophora.leiocarpa	665	20x50
7	Banksia.integrifolia	7.2	2x50
7	Banksia.integrifolia	73	20x50
7	Banksia.integrifolia	150	20x50
7	Corymbia.intermedia	152	20x50
7	Corymbia.intermedia	166	20x50
7	Corymbia.intermedia	495	20x50
7	Eucalyptus.latisinensis	6.9	2x50
7	Eucalyptus.latisinensis	94	20x50
7	Eucalyptus.latisinensis	95	20x50
7	Eucalyptus.latisinensis	194	20x50
7	Eucalyptus.latisinensis	196	20x50
7	Eucalyptus.latisinensis	237	20x50
7	Eucalyptus.latisinensis	295	20x50
7	Eucalyptus.latisinensis	460	20x50
7	Lophostemon.suaveolens	34	2x50
7	Lophostemon.suaveolens	86	20x50
7	Lophostemon.suaveolens	104	20x50
7	Lophostemon.suaveolens	107	20x50
7	Lophostemon.suaveolens	115	20x50
7	Lophostemon.suaveolens	153	20x50
7	Lophostemon.suaveolens	173	20x50
7	Lophostemon.suaveolens	178	20x50
7	Lophostemon.suaveolens	198	20x50
7	Lophostemon.suaveolens	198	20x50
7	Lophostemon.suaveolens	213	20x50
7	Melaleuca.quinquenervia	86	20x50
7	Melaleuca.quinquenervia	145	20x50
7	Melaleuca.quinquenervia	148	20x50
7	Melaleuca.quinquenervia	153	20x50
7	Melaleuca.quinquenervia	178	20x50
7	Melaleuca.quinquenervia	178	20x50
7	Melaleuca.quinquenervia	198	20x50
7	Melastoma.malabathricum	5.1	2x50
7	Melastoma.malabathricum	5.7	2x50
7	Melastoma.malabathricum	5.9	2x50
7	Melastoma.malabathricum	6	2x50
7	Melastoma.malabathricum	6.1	2x50
7	Melastoma.malabathricum	6.2	2x50
7	Melastoma.malabathricum	6.7	2x50
7	Melastoma.malabathricum	6.8	2x50
7	Melastoma.malabathricum	6.8	2x50
7	Melastoma.malabathricum	10.3	2x50
8	Acacia.glaucocarpa	54	20x50
8	Acacia.glaucocarpa	54	20x50
8	Acacia.glaucocarpa	73	20x50
8	Acacia.glaucocarpa	78	20x50
8	Acacia.leiocalyx	6.1	2x50
8	Acacia.leiocalyx	62	20x50
8	Angophora.leiocarpa	104	20x50
8	Angophora.leiocarpa	161	20x50
8	Brachychiton.populneus	117	20x50
8	Corymbia.citriodora	8.5	2x50
8	Corymbia.citriodora	9.1	2x50
8	Corymbia.citriodora	14.2	2x50
8	Corymbia.citriodora	84	20x50
8	Corymbia.citriodora	127	20x50
8	Corymbia.citriodora	130	20x50
8	Corymbia.citriodora	186	20x50
8	Corymbia.citriodora	202	20x50
8	Corymbia.citriodora	233	20x50
8	Corymbia.citriodora	290	20x50
8	Corymbia.citriodora	296	20x50
8	Corymbia.citriodora	493	20x50
8	Eucalyptus.crebra	6.1	2x50
8	Eucalyptus.crebra	6.7	2x50
8	Eucalyptus.crebra	68	20x50
8	Eucalyptus.crebra	79	20x50
8	Eucalyptus.crebra	96	20x50
8	Eucalyptus.crebra	134	20x50
8	Eucalyptus.crebra	148	20x50
8	Eucalyptus.crebra	175	20x50
8	Eucalyptus.crebra	202	20x50
8	Eucalyptus.crebra	215	20x50
8	Eucalyptus.crebra	219	20x50
8	Eucalyptus.crebra	230	20x50
8	Eucalyptus.crebra	234	20x50
8	Eucalyptus.crebra	243	20x50
8	Eucalyptus.crebra	247	20x50
8	Eucalyptus.crebra	254	20x50
8	Eucalyptus.crebra	275	20x50
8	Eucalyptus.crebra	279	20x50
8	Eucalyptus.major	300	20x50
8	Eucalyptus.major	356	20x50
8	Eucalyptus.major	368	20x50
8	Eucalyptus.major	431	20x50
9	Acalypha.capillipes	5	2x50
9	Acalypha.capillipes	5.1	2x50
9	Acalypha.capillipes	5.2	2x50
9	Acalypha.capillipes	5.5	2x50
9	Acalypha.capillipes	5.6	2x50
9	Acalypha.capillipes	5.6	2x50
9	Acalypha.capillipes	5.9	2x50
9	Acalypha.capillipes	6.2	2x50
9	Acalypha.capillipes	6.4	2x50
9	Acalypha.capillipes	6.7	2x50
9	Acalypha.capillipes	7.2	2x50
9	Acalypha.capillipes	7.2	2x50
9	Acalypha.capillipes	7.3	2x50
9	Acalypha.capillipes	7.7	2x50
9	Acalypha.capillipes	7.7	2x50
9	Acalypha.capillipes	7.8	2x50
9	Acalypha.capillipes	7.9	2x50
9	Acalypha.capillipes	8.1	2x50
9	Acalypha.capillipes	9.1	2x50
9	Acalypha.capillipes	9.8	2x50
9	Acalypha.capillipes	10.3	2x50
9	Acalypha.capillipes	11.4	2x50
9	Acalypha.capillipes	11.5	2x50
9	Acalypha.capillipes	11.5	2x50
9	Acalypha.capillipes	11.7	2x50
9	Acalypha.capillipes	11.8	2x50
9	Acalypha.capillipes	11.9	2x50
9	Acalypha.capillipes	12.3	2x50
9	Acalypha.capillipes	12.5	2x50
9	Acalypha.capillipes	14.5	2x50
9	Acalypha.capillipes	14.9	2x50
9	Acalypha.capillipes	16	2x50
9	Acalypha.capillipes	16.5	2x50
9	Acalypha.capillipes	16.5	2x50
9	Acalypha.capillipes	17.1	2x50
9	Acalypha.capillipes	17.5	2x50
9	Acalypha.capillipes	17.8	2x50
9	Acalypha.capillipes	18.1	2x50
9	Acalypha.capillipes	18.6	2x50
9	Acalypha.capillipes	18.9	2x50
9	Acalypha.capillipes	19.2	2x50
9	Acalypha.capillipes	20	2x50
9	Acalypha.capillipes	20	2x50
9	Acalypha.capillipes	20.8	2x50
9	Acalypha.capillipes	21	2x50
9	Acalypha.capillipes	21.1	2x50
9	Acalypha.capillipes	21.3	2x50
9	Acalypha.capillipes	23.6	2x50
9	Acalypha.capillipes	23.6	2x50
9	Acalypha.capillipes	25.9	2x50
9	Acalypha.capillipes	27.6	2x50
9	Acalypha.capillipes	30.8	2x50
9	Acalypha.capillipes	32	2x50
9	Acalypha.capillipes	37	2x50
9	Acalypha.capillipes	40.9	2x50
9	Acalypha.capillipes	52	20x50
9	Acalypha.capillipes	52	20x50
9	Acalypha.capillipes	58	20x50
9	Acalypha.capillipes	58	20x50
9	Acalypha.capillipes	60	20x50
9	Acalypha.capillipes	63	20x50
9	Acalypha.capillipes	63	20x50
9	Acalypha.capillipes	64	20x50
9	Acalypha.capillipes	64	20x50
9	Acalypha.capillipes	66	20x50
9	Acalypha.capillipes	74	20x50
9	Acalypha.capillipes	83	20x50
9	Acalypha.capillipes	96	20x50
9	Acronychia.laevis	96	20x50
9	Alyxia.ruscifolia	7.2	2x50
9	Alyxia.ruscifolia	7.3	2x50
9	Alyxia.ruscifolia	7.3	2x50
9	Alyxia.ruscifolia	14.6	2x50
9	Alyxia.ruscifolia	16.6	2x50
9	Alyxia.ruscifolia	19.6	2x50
9	Araucaria.cunninghamii	446	20x50
9	Araucaria.cunninghamii	455	20x50
9	Araucaria.cunninghamii	660	20x50
9	Araucaria.cunninghamii	690	20x50
9	Araucaria.cunninghamii	755	20x50
9	Araucaria.cunninghamii	862	20x50
9	Baloghia.inophylla	217	20x50
9	Capparis.arborea	68	20x50
9	Capparis.arborea	70	20x50
9	Cissus.antarctica	15.4	2x50
9	Cissus.antarctica	21.9	2x50
9	Claoxylon.australe	63	20x50
9	Claoxylon.australe	135	20x50
9	Cryptocarya.bidwillii	118	20x50
9	Cryptocarya.bidwillii	119	20x50
9	Cryptocarya.bidwillii	157	20x50
9	Dendrocnide.excelsa	339	20x50
9	Denhamia.bilocularis	66	20x50
9	Denhamia.bilocularis	74	20x50
9	Denhamia.bilocularis	83	20x50
9	Denhamia.bilocularis	119	20x50
9	Diospyros.pentamera	271	20x50
9	Drypetes.deplanchei	9.4	2x50
9	Drypetes.deplanchei	13.5	2x50
9	Drypetes.deplanchei	17.4	2x50
9	Elattostachys.xylocarpa	13	2x50
9	Elattostachys.xylocarpa	22.4	2x50
9	Elattostachys.xylocarpa	32.1	2x50
9	Elattostachys.xylocarpa	66	20x50
9	Elattostachys.xylocarpa	72	20x50
9	Elattostachys.xylocarpa	75	20x50
9	Elattostachys.xylocarpa	76	20x50
9	Elattostachys.xylocarpa	77	20x50
9	Elattostachys.xylocarpa	84	20x50
9	Elattostachys.xylocarpa	87	20x50
9	Elattostachys.xylocarpa	94	20x50
9	Elattostachys.xylocarpa	99	20x50
9	Elattostachys.xylocarpa	111	20x50
9	Elattostachys.xylocarpa	114	20x50
9	Elattostachys.xylocarpa	122	20x50
9	Elattostachys.xylocarpa	136	20x50
9	Elattostachys.xylocarpa	140	20x50
9	Elattostachys.xylocarpa	166	20x50
9	Elattostachys.xylocarpa	174	20x50
9	Elattostachys.xylocarpa	232	20x50
9	Elattostachys.xylocarpa	237	20x50
9	Elattostachys.xylocarpa	245	20x50
9	Elattostachys.xylocarpa	282	20x50
9	Elattostachys.xylocarpa	385	20x50
9	Embelia.australiana	12.2	2x50
9	Geitonoplesium.cymosum	5	2x50
9	Geitonoplesium.cymosum	5.1	2x50
9	Geitonoplesium.cymosum	5.6	2x50
9	Gossia.bidwillii	21.7	2x50
9	Gossia.bidwillii	42.8	2x50
9	Gossia.bidwillii	44	2x50
9	Gossia.bidwillii	87	20x50
9	Gossia.bidwillii	131	20x50
9	Olea.paniculata	121	20x50
9	Olea.paniculata	122	20x50
9	Olea.paniculata	175	20x50
9	Olea.paniculata	175	20x50
9	Olea.paniculata	262	20x50
9	Pandorea.jasminoides	12.8	2x50
9	Pandorea.jasminoides	13.4	2x50
9	Pandorea.jasminoides	14	2x50
9	Pandorea.pandorana	21.2	2x50
9	Planchonella.australis	15.7	2x50
9	Planchonella.australis	55	20x50
9	Planchonella.australis	64	20x50
9	Planchonella.australis	70	20x50
9	Planchonella.australis	73	20x50
9	Planchonella.australis	75	20x50
9	Planchonella.australis	79	20x50
9	Planchonella.australis	84	20x50
9	Planchonella.australis	86	20x50
9	Planchonella.australis	87	20x50
9	Planchonella.australis	90	20x50
9	Planchonella.australis	92	20x50
9	Planchonella.australis	93	20x50
9	Planchonella.australis	95	20x50
9	Planchonella.australis	96	20x50
9	Planchonella.australis	100	20x50
9	Planchonella.australis	113	20x50
9	Planchonella.australis	113	20x50
9	Planchonella.australis	114	20x50
9	Planchonella.australis	115	20x50
9	Planchonella.australis	123	20x50
9	Planchonella.australis	124	20x50
9	Planchonella.australis	127	20x50
9	Planchonella.australis	137	20x50
9	Planchonella.australis	140	20x50
9	Planchonella.australis	153	20x50
9	Planchonella.australis	156	20x50
9	Planchonella.australis	172	20x50
9	Planchonella.australis	211	20x50
9	Planchonella.australis	212	20x50
9	Planchonella.australis	351	20x50
9	Polyscias.elegans	51	20x50
9	Polyscias.elegans	90	20x50
9	Polyscias.elegans	124	20x50
9	Polyscias.elegans	153	20x50
9	Polyscias.elegans	183	20x50
9	Psychotria.daphnoides	5.6	2x50
9	Psychotria.daphnoides	17.9	2x50
9	Psychotria.daphnoides	32	2x50
9	Psydrax.odorata	5.8	2x50
9	Psydrax.odorata	8.3	2x50
9	Psydrax.odorata	8.5	2x50
9	Psydrax.odorata	11.7	2x50
9	Psydrax.odorata	13.4	2x50
9	Psydrax.odorata	16.9	2x50
9	Psydrax.odorata	17.7	2x50
9	Psydrax.odorata	39	2x50
9	Psydrax.odorata	58	20x50
9	Smilax.australis	7.2	2x50
9	Smilax.australis	8.7	2x50
9	Tetrastigma.nitens	28.1	2x50
9	Tinospora.smilacina	31.6	2x50
9	Toona.ciliata	81	20x50
9	Toona.ciliata	364	20x50
9	Toona.ciliata	530	20x50
9	Vitex.lignum-vitae	134	20x50
9	Zanthoxylum.brachyacanthum	16.7	2x50
9	Zanthoxylum.brachyacanthum	26.7	2x50
9	Zanthoxylum.brachyacanthum	43.8	2x50
9	Zanthoxylum.brachyacanthum	44.2	2x50
9	Zanthoxylum.brachyacanthum	51	20x50
10	Alphitonia.excelsa	5.4	2x50
10	Corymbia.citriodora	25.6	2x50
10	Corymbia.citriodora	55	20x50
10	Corymbia.citriodora	70	20x50
10	Corymbia.citriodora	80	20x50
10	Corymbia.citriodora	225	20x50
10	Corymbia.citriodora	322	20x50
10	Eucalyptus.crebra	55	20x50
10	Eucalyptus.crebra	59	20x50
10	Eucalyptus.crebra	67	20x50
10	Eucalyptus.crebra	69	20x50
10	Eucalyptus.crebra	164	20x50
10	Eucalyptus.crebra	233	20x50
10	Eucalyptus.moluccana	72	20x50
10	Eucalyptus.moluccana	86	20x50
10	Eucalyptus.moluccana	139	20x50
10	Eucalyptus.moluccana	199	20x50
10	Eucalyptus.moluccana	389	20x50
10	Eucalyptus.moluccana	396	20x50
10	Eucalyptus.moluccana	409	20x50
10	Eucalyptus.moluccana	448	20x50
10	Eucalyptus.tereticornis	462	20x50
10	Eucalyptus.tereticornis	483	20x50
11	Baeckea.frutescens	5.2	1x50
11	Baeckea.frutescens	6.9	1x50
11	Baeckea.frutescens	7.6	1x50
11	Baeckea.frutescens	7.8	1x50
11	Baeckea.frutescens	13.4	1x50
11	Baeckea.frutescens	13.7	1x50
11	Banksia.aemula	51	20x50
11	Banksia.aemula	61	20x50
11	Banksia.aemula	71	20x50
11	Banksia.aemula	79	20x50
11	Banksia.aemula	92	20x50
11	Banksia.aemula	98	20x50
11	Banksia.aemula	106	20x50
11	Banksia.aemula	118	20x50
11	Banksia.aemula	132	20x50
11	Banksia.aemula	142	20x50
11	Banksia.aemula	148	20x50
11	Banksia.aemula	158	20x50
11	Banksia.aemula	167	20x50
11	Banksia.oblongifolia	5.4	1x50
11	Banksia.oblongifolia	5.4	1x50
11	Banksia.oblongifolia	5.5	1x50
11	Banksia.oblongifolia	5.6	1x50
11	Banksia.oblongifolia	5.6	1x50
11	Banksia.oblongifolia	5.8	1x50
11	Banksia.oblongifolia	5.9	1x50
11	Banksia.oblongifolia	5.9	1x50
11	Banksia.oblongifolia	5.9	1x50
11	Banksia.oblongifolia	6	1x50
11	Banksia.oblongifolia	6	1x50
11	Banksia.oblongifolia	6.2	1x50
11	Banksia.oblongifolia	6.2	1x50
11	Banksia.oblongifolia	6.4	1x50
11	Banksia.oblongifolia	6.4	1x50
11	Banksia.oblongifolia	6.5	1x50
11	Banksia.oblongifolia	6.5	1x50
11	Banksia.oblongifolia	6.6	1x50
11	Banksia.oblongifolia	6.8	1x50
11	Banksia.oblongifolia	6.9	1x50
11	Banksia.oblongifolia	6.9	1x50
11	Banksia.oblongifolia	7.1	1x50
11	Banksia.oblongifolia	7.1	1x50
11	Banksia.oblongifolia	7.1	1x50
11	Banksia.oblongifolia	7.2	1x50
11	Banksia.oblongifolia	7.3	1x50
11	Banksia.oblongifolia	7.4	1x50
11	Banksia.oblongifolia	7.4	1x50
11	Banksia.oblongifolia	7.5	1x50
11	Banksia.oblongifolia	7.5	1x50
11	Banksia.oblongifolia	7.6	1x50
11	Banksia.oblongifolia	7.6	1x50
11	Banksia.oblongifolia	7.8	1x50
11	Banksia.oblongifolia	7.9	1x50
11	Banksia.oblongifolia	8.5	1x50
11	Banksia.oblongifolia	8.5	1x50
11	Banksia.oblongifolia	8.6	1x50
11	Banksia.oblongifolia	8.8	1x50
11	Banksia.oblongifolia	9	1x50
11	Banksia.oblongifolia	9.2	1x50
11	Banksia.oblongifolia	9.2	1x50
11	Banksia.oblongifolia	9.3	1x50
11	Banksia.oblongifolia	9.3	1x50
11	Banksia.oblongifolia	9.4	1x50
11	Banksia.oblongifolia	9.5	1x50
11	Banksia.oblongifolia	9.7	1x50
11	Banksia.oblongifolia	9.9	1x50
11	Banksia.oblongifolia	10.2	1x50
11	Banksia.oblongifolia	10.3	1x50
11	Banksia.oblongifolia	10.3	1x50
11	Banksia.oblongifolia	10.4	1x50
11	Banksia.oblongifolia	10.6	1x50
11	Banksia.oblongifolia	10.6	1x50
11	Banksia.oblongifolia	10.8	1x50
11	Banksia.oblongifolia	10.9	1x50
11	Banksia.oblongifolia	11.1	1x50
11	Banksia.oblongifolia	11.2	1x50
11	Banksia.oblongifolia	11.2	1x50
11	Banksia.oblongifolia	11.5	1x50
11	Banksia.oblongifolia	11.6	1x50
11	Banksia.oblongifolia	11.7	1x50
11	Banksia.oblongifolia	11.8	1x50
11	Banksia.oblongifolia	11.9	1x50
11	Banksia.oblongifolia	11.9	1x50
11	Banksia.oblongifolia	11.9	1x50
11	Banksia.oblongifolia	11.9	1x50
11	Banksia.oblongifolia	12.4	1x50
11	Banksia.oblongifolia	12.4	1x50
11	Banksia.oblongifolia	12.5	1x50
11	Banksia.oblongifolia	12.7	1x50
11	Banksia.oblongifolia	12.8	1x50
11	Banksia.oblongifolia	12.8	1x50
11	Banksia.oblongifolia	12.9	1x50
11	Banksia.oblongifolia	13	1x50
11	Banksia.oblongifolia	13.6	1x50
11	Banksia.oblongifolia	13.8	1x50
11	Banksia.oblongifolia	14	1x50
11	Banksia.oblongifolia	14.1	1x50
11	Banksia.oblongifolia	14.2	1x50
11	Banksia.oblongifolia	14.2	1x50
11	Banksia.oblongifolia	14.2	1x50
11	Banksia.oblongifolia	14.8	1x50
11	Banksia.oblongifolia	14.8	1x50
11	Banksia.oblongifolia	14.8	1x50
11	Banksia.oblongifolia	15.3	1x50
11	Banksia.oblongifolia	15.4	1x50
11	Banksia.oblongifolia	15.8	1x50
11	Banksia.oblongifolia	15.9	1x50
11	Banksia.oblongifolia	16.2	1x50
11	Banksia.oblongifolia	17.4	1x50
11	Banksia.oblongifolia	17.6	1x50
11	Banksia.oblongifolia	18.3	1x50
11	Banksia.oblongifolia	19.4	1x50
11	Banksia.oblongifolia	19.4	1x50
11	Banksia.oblongifolia	21.3	1x50
11	Banksia.oblongifolia	23.3	1x50
11	Banksia.oblongifolia	23.9	1x50
11	Banksia.oblongifolia	24.5	1x50
11	Banksia.oblongifolia	24.6	1x50
11	Dillwynia.retorta	5.3	1x50
11	Eucalyptus.latisinensis	52	20x50
11	Eucalyptus.latisinensis	52	20x50
11	Eucalyptus.latisinensis	54	20x50
11	Eucalyptus.latisinensis	54	20x50
11	Eucalyptus.latisinensis	56	20x50
11	Eucalyptus.latisinensis	57	20x50
11	Eucalyptus.latisinensis	57	20x50
11	Eucalyptus.latisinensis	58	20x50
11	Eucalyptus.latisinensis	61	20x50
11	Eucalyptus.latisinensis	62	20x50
11	Eucalyptus.latisinensis	63	20x50
11	Eucalyptus.latisinensis	63	20x50
11	Eucalyptus.latisinensis	64	20x50
11	Eucalyptus.latisinensis	64	20x50
11	Eucalyptus.latisinensis	64	20x50
11	Eucalyptus.latisinensis	65	20x50
11	Eucalyptus.latisinensis	66	20x50
11	Eucalyptus.latisinensis	67	20x50
11	Eucalyptus.latisinensis	70	20x50
11	Eucalyptus.latisinensis	70	20x50
11	Eucalyptus.latisinensis	70	20x50
11	Eucalyptus.latisinensis	71	20x50
11	Eucalyptus.latisinensis	71.7	20x50
11	Eucalyptus.latisinensis	72	20x50
11	Eucalyptus.latisinensis	74	20x50
11	Eucalyptus.latisinensis	74	20x50
11	Eucalyptus.latisinensis	74	20x50
11	Eucalyptus.latisinensis	75	20x50
11	Eucalyptus.latisinensis	76	20x50
11	Eucalyptus.latisinensis	76	20x50
11	Eucalyptus.latisinensis	78	20x50
11	Eucalyptus.latisinensis	78	20x50
11	Eucalyptus.latisinensis	78	20x50
11	Eucalyptus.latisinensis	78	20x50
11	Eucalyptus.latisinensis	80	20x50
11	Eucalyptus.latisinensis	80	20x50
11	Eucalyptus.latisinensis	81	20x50
11	Eucalyptus.latisinensis	81	20x50
11	Eucalyptus.latisinensis	81	20x50
11	Eucalyptus.latisinensis	84	20x50
11	Eucalyptus.latisinensis	84	20x50
11	Eucalyptus.latisinensis	86	20x50
11	Eucalyptus.latisinensis	86	20x50
11	Eucalyptus.latisinensis	87	20x50
11	Eucalyptus.latisinensis	87	20x50
11	Eucalyptus.latisinensis	89	20x50
11	Eucalyptus.latisinensis	89	20x50
11	Eucalyptus.latisinensis	90	20x50
11	Eucalyptus.latisinensis	95	20x50
11	Eucalyptus.latisinensis	96	20x50
11	Eucalyptus.latisinensis	101	20x50
11	Eucalyptus.latisinensis	102	20x50
11	Eucalyptus.latisinensis	106	20x50
11	Eucalyptus.latisinensis	120	20x50
11	Eucalyptus.latisinensis	121	20x50
11	Eucalyptus.latisinensis	127	20x50
11	Eucalyptus.latisinensis	134	20x50
11	Eucalyptus.latisinensis	139	20x50
11	Eucalyptus.latisinensis	147	20x50
11	Eucalyptus.latisinensis	152	20x50
11	Eucalyptus.latisinensis	171	20x50
11	Eucalyptus.latisinensis	180	20x50
11	Eucalyptus.latisinensis	186	20x50
11	Eucalyptus.latisinensis	200	20x50
11	Eucalyptus.latisinensis	220	20x50
11	Hakea.actites	10.1	1x50
11	Hakea.actites	16.9	1x50
11	Hakea.actites	24.7	1x50
11	Hakea.actites	28.5	1x50
11	Hakea.actites	33	1x50
11	Hakea.actites	33.5	1x50
11	Hakea.actites	33.9	1x50
11	Hakea.actites	38.5	1x50
11	Leptospermum.polygalifolium	5	1x50
11	Leptospermum.polygalifolium	5.1	1x50
11	Leptospermum.polygalifolium	5.1	1x50
11	Leptospermum.polygalifolium	5.3	1x50
11	Leptospermum.polygalifolium	5.3	1x50
11	Leptospermum.polygalifolium	5.4	1x50
11	Leptospermum.polygalifolium	5.5	1x50
11	Leptospermum.polygalifolium	5.5	1x50
11	Leptospermum.polygalifolium	5.5	1x50
11	Leptospermum.polygalifolium	5.7	1x50
11	Leptospermum.polygalifolium	5.8	1x50
11	Leptospermum.polygalifolium	6.1	1x50
11	Leptospermum.polygalifolium	6.2	1x50
11	Leptospermum.polygalifolium	6.4	1x50
11	Leptospermum.polygalifolium	6.4	1x50
11	Leptospermum.polygalifolium	6.4	1x50
11	Leptospermum.polygalifolium	6.5	1x50
11	Leptospermum.polygalifolium	6.7	1x50
11	Leptospermum.polygalifolium	6.8	1x50
11	Leptospermum.polygalifolium	6.8	1x50
11	Leptospermum.polygalifolium	6.9	1x50
11	Leptospermum.polygalifolium	6.9	1x50
11	Leptospermum.polygalifolium	7.2	1x50
11	Leptospermum.polygalifolium	7.2	1x50
11	Leptospermum.polygalifolium	7.3	1x50
11	Leptospermum.polygalifolium	7.6	1x50
11	Leptospermum.polygalifolium	7.9	1x50
11	Leptospermum.polygalifolium	8.1	1x50
11	Leptospermum.polygalifolium	8.1	1x50
11	Leptospermum.polygalifolium	8.1	1x50
11	Leptospermum.polygalifolium	8.2	1x50
11	Leptospermum.polygalifolium	8.2	1x50
11	Leptospermum.polygalifolium	8.3	1x50
11	Leptospermum.polygalifolium	8.4	1x50
11	Leptospermum.polygalifolium	8.4	1x50
11	Leptospermum.polygalifolium	8.6	1x50
11	Leptospermum.polygalifolium	8.6	1x50
11	Leptospermum.polygalifolium	8.6	1x50
11	Leptospermum.polygalifolium	8.7	1x50
11	Leptospermum.polygalifolium	8.7	1x50
11	Leptospermum.polygalifolium	8.9	1x50
11	Leptospermum.polygalifolium	8.9	1x50
11	Leptospermum.polygalifolium	9.1	1x50
11	Leptospermum.polygalifolium	9.2	1x50
11	Leptospermum.polygalifolium	9.3	1x50
11	Leptospermum.polygalifolium	9.5	1x50
11	Leptospermum.polygalifolium	9.6	1x50
11	Leptospermum.polygalifolium	9.6	1x50
11	Leptospermum.polygalifolium	9.9	1x50
11	Leptospermum.polygalifolium	9.9	1x50
11	Leptospermum.polygalifolium	10	1x50
11	Leptospermum.polygalifolium	10.1	1x50
11	Leptospermum.polygalifolium	10.1	1x50
11	Leptospermum.polygalifolium	10.1	1x50
11	Leptospermum.polygalifolium	10.5	1x50
11	Leptospermum.polygalifolium	10.5	1x50
11	Leptospermum.polygalifolium	10.7	1x50
11	Leptospermum.polygalifolium	10.7	1x50
11	Leptospermum.polygalifolium	10.9	1x50
11	Leptospermum.polygalifolium	11	1x50
11	Leptospermum.polygalifolium	11.1	1x50
11	Leptospermum.polygalifolium	11.1	1x50
11	Leptospermum.polygalifolium	11.1	1x50
11	Leptospermum.polygalifolium	11.5	1x50
11	Leptospermum.polygalifolium	11.6	1x50
11	Leptospermum.polygalifolium	11.7	1x50
11	Leptospermum.polygalifolium	11.9	1x50
11	Leptospermum.polygalifolium	12.1	1x50
11	Leptospermum.polygalifolium	12.4	1x50
11	Leptospermum.polygalifolium	12.8	1x50
11	Leptospermum.polygalifolium	13.2	1x50
11	Leptospermum.polygalifolium	13.2	1x50
11	Leptospermum.polygalifolium	13.3	1x50
11	Leptospermum.polygalifolium	13.3	1x50
11	Leptospermum.polygalifolium	13.6	1x50
11	Leptospermum.polygalifolium	13.9	1x50
11	Leptospermum.polygalifolium	14	1x50
11	Leptospermum.polygalifolium	14.4	1x50
11	Leptospermum.polygalifolium	14.5	1x50
11	Leptospermum.polygalifolium	14.5	1x50
11	Leptospermum.polygalifolium	15.9	1x50
11	Leptospermum.polygalifolium	16.2	1x50
11	Leptospermum.polygalifolium	16.4	1x50
11	Leptospermum.polygalifolium	16.6	1x50
11	Leptospermum.polygalifolium	16.8	1x50
11	Leptospermum.polygalifolium	18.5	1x50
11	Leptospermum.polygalifolium	19.2	1x50
11	Leptospermum.polygalifolium	19.4	1x50
11	Leptospermum.polygalifolium	19.9	1x50
11	Leptospermum.polygalifolium	19.9	1x50
11	Leptospermum.polygalifolium	19.9	1x50
11	Leptospermum.polygalifolium	20.3	1x50
11	Leptospermum.polygalifolium	21.6	1x50
11	Leptospermum.polygalifolium	24.1	1x50
11	Leptospermum.polygalifolium	27.7	1x50
11	Leptospermum.polygalifolium	27.8	1x50
11	Leptospermum.trinervium	50	20x50
11	Leptospermum.trinervium	61	20x50
11	Leucopogon.ericoides	5.2	1x50
11	Lophostemon.suaveolens	63	20x50
11	Lophostemon.suaveolens	89	20x50
11	Melaleuca.cheelii	74	20x50
11	Melaleuca.cheelii	75	20x50
11	Melaleuca.cheelii	90	20x50
11	Melaleuca.cheelii	92	20x50
11	Melaleuca.cheelii	93	20x50
11	Melaleuca.cheelii	98	20x50
11	Melaleuca.cheelii	108	20x50
11	Melaleuca.cheelii	116	20x50
11	Melaleuca.cheelii	123	20x50
11	Melaleuca.cheelii	128	20x50
11	Melaleuca.cheelii	262	20x50
11	Melaleuca.nodosa	7.9	1x50
11	Melaleuca.nodosa	8.4	1x50
11	Melaleuca.nodosa	9.1	1x50
11	Melaleuca.nodosa	10.4	1x50
11	Melaleuca.nodosa	10.7	1x50
11	Melaleuca.nodosa	11.4	1x50
11	Melaleuca.nodosa	11.6	1x50
11	Melaleuca.nodosa	12.1	1x50
11	Melaleuca.nodosa	12.3	1x50
11	Melaleuca.nodosa	13.3	1x50
11	Melaleuca.nodosa	13.8	1x50
11	Melaleuca.nodosa	14.2	1x50
11	Melaleuca.nodosa	14.4	1x50
11	Melaleuca.nodosa	14.9	1x50
11	Melaleuca.nodosa	17.3	1x50
11	Melaleuca.nodosa	17.5	1x50
11	Melaleuca.nodosa	20.1	1x50
11	Melaleuca.nodosa	20.9	1x50
11	Melaleuca.nodosa	21.8	1x50
11	Melaleuca.nodosa	22.2	1x50
11	Melaleuca.nodosa	22.7	1x50
11	Melaleuca.nodosa	23.2	1x50
11	Melaleuca.nodosa	23.3	1x50
11	Melaleuca.nodosa	24.8	1x50
11	Melaleuca.nodosa	24.8	1x50
11	Melaleuca.nodosa	25.1	1x50
11	Melaleuca.nodosa	36.7	1x50
11	Micromyrtus.littoralis	5.1	1x50
11	Micromyrtus.littoralis	5.2	1x50
11	Micromyrtus.littoralis	5.2	1x50
11	Micromyrtus.littoralis	5.3	1x50
11	Micromyrtus.littoralis	5.4	1x50
11	Micromyrtus.littoralis	5.7	1x50
11	Micromyrtus.littoralis	5.7	1x50
11	Micromyrtus.littoralis	5.8	1x50
11	Micromyrtus.littoralis	6.2	1x50
11	Micromyrtus.littoralis	6.3	1x50
11	Micromyrtus.littoralis	6.5	1x50
11	Micromyrtus.littoralis	7	1x50
11	Micromyrtus.littoralis	7	1x50
11	Micromyrtus.littoralis	7.1	1x50
11	Micromyrtus.littoralis	7.7	1x50
11	Micromyrtus.littoralis	7.9	1x50
11	Micromyrtus.littoralis	8	1x50
11	Micromyrtus.littoralis	9	1x50
11	Micromyrtus.littoralis	9.4	1x50
11	Micromyrtus.littoralis	11.4	1x50
11	Micromyrtus.littoralis	11.5	1x50
11	Micromyrtus.littoralis	12.7	1x50
11	Ochrosperma.lineare	7.9	1x50
11	Petrophile.shirleyae	5.4	1x50
11	Petrophile.shirleyae	5.8	1x50
11	Petrophile.shirleyae	5.9	1x50
11	Petrophile.shirleyae	6.2	1x50
11	Petrophile.shirleyae	6.3	1x50
11	Petrophile.shirleyae	6.4	1x50
11	Petrophile.shirleyae	6.5	1x50
11	Petrophile.shirleyae	6.7	1x50
11	Petrophile.shirleyae	6.9	1x50
11	Petrophile.shirleyae	7.6	1x50
11	Petrophile.shirleyae	7.8	1x50
11	Petrophile.shirleyae	8.4	1x50
11	Petrophile.shirleyae	8.4	1x50
11	Petrophile.shirleyae	8.5	1x50
11	Petrophile.shirleyae	8.7	1x50
11	Petrophile.shirleyae	9.8	1x50
11	Petrophile.shirleyae	9.9	1x50
11	Petrophile.shirleyae	10	1x50
11	Petrophile.shirleyae	10	1x50
11	Petrophile.shirleyae	10.2	1x50
11	Petrophile.shirleyae	10.2	1x50
11	Petrophile.shirleyae	10.4	1x50
11	Petrophile.shirleyae	10.5	1x50
11	Petrophile.shirleyae	10.5	1x50
11	Petrophile.shirleyae	11.2	1x50
11	Petrophile.shirleyae	11.6	1x50
11	Petrophile.shirleyae	11.8	1x50
11	Petrophile.shirleyae	12	1x50
11	Petrophile.shirleyae	12.5	1x50
11	Petrophile.shirleyae	14.4	1x50
11	Petrophile.shirleyae	14.7	1x50
11	Petrophile.shirleyae	20.4	1x50
11	Petrophile.shirleyae	22.8	1x50
11	Strangea.linearis	5.2	1x50
11	Strangea.linearis	5.6	1x50
11	Strangea.linearis	6	1x50
11	Strangea.linearis	6	1x50
11	Strangea.linearis	7	1x50
11	Strangea.linearis	7.4	1x50
11	Strangea.linearis	8.6	1x50
12	Acacia.disparrima	33.5	2x50
12	Acacia.leiocalyx	9.9	2x50
12	Acacia.leiocalyx	12.8	2x50
12	Acacia.leiocalyx	13.9	2x50
12	Acacia.leiocalyx	19.8	2x50
12	Acacia.leiocalyx	52	20x50
12	Acacia.leiocalyx	53	20x50
12	Acacia.leiocalyx	59	20x50
12	Acacia.leiocalyx	60	20x50
12	Acacia.leiocalyx	80	20x50
12	Angophora.leiocarpa	65	20x50
12	Angophora.leiocarpa	86	20x50
12	Angophora.leiocarpa	96	20x50
12	Angophora.leiocarpa	104	20x50
12	Angophora.leiocarpa	126	20x50
12	Angophora.leiocarpa	153	20x50
12	Angophora.leiocarpa	260	20x50
12	Angophora.leiocarpa	265	20x50
12	Angophora.leiocarpa	302	20x50
12	Eucalyptus.acmenoides	91	20x50
12	Eucalyptus.acmenoides	152	20x50
12	Eucalyptus.acmenoides	162	20x50
12	Eucalyptus.crebra	56	20x50
12	Eucalyptus.crebra	57	20x50
12	Eucalyptus.crebra	64	20x50
12	Eucalyptus.crebra	65	20x50
12	Eucalyptus.crebra	74	20x50
12	Eucalyptus.crebra	82	20x50
12	Eucalyptus.crebra	92	20x50
12	Eucalyptus.crebra	101	20x50
12	Eucalyptus.crebra	112	20x50
12	Eucalyptus.crebra	113	20x50
12	Eucalyptus.crebra	116	20x50
12	Eucalyptus.crebra	118	20x50
12	Eucalyptus.crebra	122	20x50
12	Eucalyptus.crebra	125	20x50
12	Eucalyptus.crebra	207	20x50
12	Eucalyptus.crebra	209	20x50
12	Eucalyptus.crebra	211	20x50
12	Eucalyptus.crebra	218	20x50
12	Eucalyptus.crebra	233	20x50
12	Eucalyptus.crebra	242	20x50
12	Eucalyptus.crebra	246	20x50
12	Eucalyptus.crebra	248	20x50
12	Eucalyptus.crebra	274	20x50
12	Eucalyptus.crebra	306	20x50
12	Eucalyptus.crebra	311	20x50
12	Eucalyptus.crebra	318	20x50
12	Eucalyptus.crebra	330	20x50
12	Eucalyptus.crebra	334	20x50
12	Eucalyptus.crebra	345	20x50
12	Eucalyptus.crebra	354	20x50
12	Eucalyptus.crebra	366	20x50
12	Jacksonia.scoparia	6.6	2x50
12	Jacksonia.scoparia	7.4	2x50
12	Jacksonia.scoparia	8.9	2x50
12	Jacksonia.scoparia	10.9	2x50
12	Jacksonia.scoparia	12.1	2x50
12	Jacksonia.scoparia	12.2	2x50
12	Jacksonia.scoparia	12.6	2x50
12	Jacksonia.scoparia	16.9	2x50
12	Jacksonia.scoparia	17.5	2x50
12	Jacksonia.scoparia	18	2x50
12	Jacksonia.scoparia	18.5	2x50
12	Jacksonia.scoparia	18.7	2x50
12	Jacksonia.scoparia	18.8	2x50
12	Jacksonia.scoparia	19.4	2x50
12	Jacksonia.scoparia	20.9	2x50
12	Jacksonia.scoparia	21.9	2x50
12	Jacksonia.scoparia	22.3	2x50
12	Jacksonia.scoparia	22.7	2x50
12	Jacksonia.scoparia	24.4	2x50
12	Lantana.camara	9.5	2x50
12	Lantana.camara	10.2	2x50
12	Lantana.camara	12.3	2x50
12	Lantana.camara	12.7	2x50
12	Lantana.camara	18.5	2x50
12	Lantana.camara	19.1	2x50
12	Lantana.camara	20.2	2x50
12	Lantana.camara	27.1	2x50
12	Lophostemon.suaveolens	50	20x50
12	Lophostemon.suaveolens	53	20x50
12	Lophostemon.suaveolens	124	20x50
12	Lophostemon.suaveolens	134	20x50
12	Lophostemon.suaveolens	153	20x50
12	Lophostemon.suaveolens	211	20x50
12	Lophostemon.suaveolens	243	20x50
12	Lophostemon.suaveolens	261	20x50
12	Melichrus.urceolatus	5.1	2x50
12	Melichrus.urceolatus	5.3	2x50
12	Melichrus.urceolatus	5.7	2x50
12	Melichrus.urceolatus	6.6	2x50
12	Melichrus.urceolatus	7.9	2x50
12	Psydrax.odorata	6.8	2x50
13	Acacia.leiocalyx	6.2	2x50
13	Acacia.leiocalyx	7.1	2x50
13	Acacia.leiocalyx	79	20x50
13	Acacia.leiocalyx	99	20x50
13	Acacia.leiocalyx	121	20x50
13	Acacia.leiocalyx	127	20x50
13	Alphitonia.excelsa	5.1	2x50
13	Alphitonia.excelsa	5.1	2x50
13	Alphitonia.excelsa	5.2	2x50
13	Alphitonia.excelsa	5.3	2x50
13	Alphitonia.excelsa	5.5	2x50
13	Alphitonia.excelsa	5.7	2x50
13	Alphitonia.excelsa	5.8	2x50
13	Alphitonia.excelsa	5.9	2x50
13	Alphitonia.excelsa	5.9	2x50
13	Alphitonia.excelsa	6.4	2x50
13	Alphitonia.excelsa	6.5	2x50
13	Alphitonia.excelsa	6.6	2x50
13	Alphitonia.excelsa	6.6	2x50
13	Alphitonia.excelsa	6.6	2x50
13	Alphitonia.excelsa	6.6	2x50
13	Alphitonia.excelsa	6.8	2x50
13	Alphitonia.excelsa	6.9	2x50
13	Alphitonia.excelsa	7.2	2x50
13	Alphitonia.excelsa	7.2	2x50
13	Alphitonia.excelsa	7.2	2x50
13	Alphitonia.excelsa	7.4	2x50
13	Alphitonia.excelsa	7.6	2x50
13	Alphitonia.excelsa	7.7	2x50
13	Alphitonia.excelsa	7.7	2x50
13	Alphitonia.excelsa	7.7	2x50
13	Alphitonia.excelsa	7.8	2x50
13	Alphitonia.excelsa	8.2	2x50
13	Alphitonia.excelsa	8.3	2x50
13	Alphitonia.excelsa	8.3	2x50
13	Alphitonia.excelsa	8.4	2x50
13	Alphitonia.excelsa	8.4	2x50
13	Alphitonia.excelsa	8.9	2x50
13	Alphitonia.excelsa	8.9	2x50
13	Alphitonia.excelsa	8.9	2x50
13	Alphitonia.excelsa	9.1	2x50
13	Alphitonia.excelsa	9.3	2x50
13	Alphitonia.excelsa	9.3	2x50
13	Alphitonia.excelsa	9.4	2x50
13	Alphitonia.excelsa	9.6	2x50
13	Alphitonia.excelsa	9.6	2x50
13	Alphitonia.excelsa	9.8	2x50
13	Alphitonia.excelsa	9.8	2x50
13	Alphitonia.excelsa	9.9	2x50
13	Alphitonia.excelsa	9.9	2x50
13	Alphitonia.excelsa	10	2x50
13	Alphitonia.excelsa	10.3	2x50
13	Alphitonia.excelsa	10.5	2x50
13	Alphitonia.excelsa	10.6	2x50
13	Alphitonia.excelsa	10.9	2x50
13	Alphitonia.excelsa	10.9	2x50
13	Alphitonia.excelsa	11.4	2x50
13	Alphitonia.excelsa	11.9	2x50
13	Alphitonia.excelsa	12.7	2x50
13	Alphitonia.excelsa	12.8	2x50
13	Alphitonia.excelsa	14.3	2x50
13	Alphitonia.excelsa	16.1	2x50
13	Alphitonia.excelsa	17.4	2x50
13	Alphitonia.excelsa	18.2	2x50
13	Alphitonia.excelsa	94	20x50
13	Angophora.leiocarpa	29.6	2x50
13	Angophora.leiocarpa	62	20x50
13	Angophora.leiocarpa	75	20x50
13	Angophora.leiocarpa	91	20x50
13	Angophora.leiocarpa	91.2	20x50
13	Angophora.leiocarpa	93	20x50
13	Angophora.leiocarpa	94	20x50
13	Angophora.leiocarpa	98	20x50
13	Angophora.leiocarpa	112	20x50
13	Angophora.leiocarpa	115	20x50
13	Angophora.leiocarpa	115	20x50
13	Angophora.leiocarpa	119	20x50
13	Angophora.leiocarpa	130	20x50
13	Angophora.leiocarpa	134	20x50
13	Angophora.leiocarpa	134	20x50
13	Angophora.leiocarpa	141	20x50
13	Angophora.leiocarpa	142	20x50
13	Angophora.leiocarpa	190	20x50
13	Angophora.leiocarpa	196	20x50
13	Angophora.leiocarpa	202	20x50
13	Angophora.leiocarpa	218	20x50
13	Angophora.leiocarpa	289	20x50
13	Corymbia.citriodora	273	20x50
13	Eucalyptus.acmenoides	11.7	2x50
13	Eucalyptus.acmenoides	75	20x50
13	Eucalyptus.acmenoides	159	20x50
13	Eucalyptus.acmenoides	202	20x50
13	Eucalyptus.acmenoides	254	20x50
13	Eucalyptus.acmenoides	286	20x50
[truncated: 1,985 more rows]
